# Supplementary material for: Genomic analysis reveals hidden biodiversity within colugos, the sister group to primates
Source: PubMed Central journal article supplement — Sci Adv. 2016 Aug 10;2(8):e1600633. doi: 10.1126/sciadv.1600633 (PMC4980104; doi:10.1126/sciadv.1600633), 2016-08-10
Supplement: 1600633_SM.pdf [file 1600633_SM.pdf]

## Supplementary Materials for

### **Genomic analysis reveals hidden biodiversity within colugos, the sister group to primates**

Victor C. Mason, Gang Li, Patrick Minx, Jürgen Schmitz, Gennady Churakov, Liliya Doronina, Amanda D. Melin, Nathaniel J. Dominy, Norman T.-L. Lim, Mark S. Springer, Richard K. Wilson, Wesley C. Warren, Kristofer M. Helgen, William J. Murphy

Published 10 August 2016, *Sci. Adv.* **2**, e1600633 (2016)

DOI: 10.1126/sciadv.1600633

#### **The PDF file includes:**

- fig. S1. Maximum likelihood phylogeny of Euarchontoglires based on an alignment of 631 orthologous protein-coding sequences.
- fig. S2. Insertion-deletion evidence for colugo phylogenetic relationships based on transposons.
- fig. S3. Description of the transposon screening strategy.
- fig. S4. Phylogenetically informative protein-coding gene indels supporting Primatomorpha (P1 to P15), Sundatheria (S1 to S5), and Primates + Scandentia (PS1 to PS5).
- fig. S5. Maximum likelihood timetree showing seven nodes with external fossil calibrations.
- fig. S6. Maximum likelihood timetree showing seven nodes with external fossil calibrations, with euarchontan monophyly enforced.
- fig. S7. Maximum likelihood mtDNA tree based on a matrix of 53 colugos with  $\geq 90\%$  mitogenome coverage.
- fig. S8. Maximum likelihood mtDNA tree based on a matrix of 65 colugos with  $\geq 30\%$  mitogenome coverage.
- fig. S9. Maximum likelihood tree based on a combined nuclear (biparental + Y) matrix of 17 taxa.
- fig. S10. Maximum likelihood tree based on biparental data set (18 taxa).
- fig. S11. Maximum likelihood Y chromosome tree (depth 2) (15 taxa).
- fig. S12. Maximum likelihood Y chromosome tree (depth 3) (14 taxa).
- fig. S13. Biplot of PC1 and PC2 from PCA of colugo X chromosome variants.
- fig. S14. Biplot of PC2 and PC3 from PCA of colugo X chromosome variants.

- fig. S15. Biplot of PC3 and PC4 from PCA of colugo X chromosome variants.
- fig. S16. Biplot of PC4 and PC5 from PCA of colugo X chromosome variants.
- fig. S17. Biplot of PC5 and PC6 from PCA of colugo X chromosome variants.
- fig. S18. Biplot of morphometric PCA with males and females, and no dwarf specimens removed.
- fig. S19. Biplot of colugo morphometric PCA, with male, female, and dwarf specimens, where all measurements are normalized by body size.
- table S1. Mammals used in phylogenetic analyses.
- table S2. Presence/absence of phylogenetically informative retroposon markers and species distribution.
- table S3. Location of diagnostic retroposon markers in the human genome.
- table S4.  $\chi^2$  calculation for phylogenetically informative indels.
- table S5. Colugo and select mammal *VIR* and *OR* gene annotation summaries.
- table S6. Nuclear capture efficiency.
- table S7. Adapter blocking oligos.
- table S8. Off-target mtDNA assembly statistics.
- table S9. External fossil calibrations used to calculate divergence time between the two colugo genera.
- table S10. Principal component loadings for morphometric PCA using males and females with no dwarf individuals.
- table S11. Principal component loadings for morphometric PCA using males, females, and dwarf individuals, and all measurements were normalized for body size.
- table S12. mtDNA maximum composite likelihood +  $\Gamma$  distance matrix calculated between seven Sunda colugo groups and five Philippine groups.
- table S13. X chromosome maximum composite likelihood +  $\Gamma$  distance matrix calculated between seven Sunda colugo groups and three Philippine groups.
- table S14. Between-group mtDNA composite likelihood +  $\Gamma$  distance matrix for Sunda colugos from Thailand, Peninsular Malaysia, and Sumatra, and their satellite islands.
- table S15. Within-group mtDNA maximum composite likelihood +  $\Gamma$  distance matrix.
- table S16. Between-group mtDNA composite likelihood +  $\Gamma$  distance matrix for 10 Sunda colugo groups and 5 Philippine groups.
- table S17. BPP species estimation results for Sunda colugos.
- table S18. BPP species estimation results for Philippine colugos.
- table S19. Principal component loadings for X chromosome genetic variants.
- Legends for database S1 to S7
- References (75–80)

**Other Supplementary Material for this manuscript includes the following:**

(available at [advances.sciencemag.org/cgi/content/full/2/8/e1600633/DC1](https://advances.sciencemag.org/cgi/content/full/2/8/e1600633/DC1))

- database S1 (Microsoft Excel format). Dermopteran positively selected genes.
- database S2 (Microsoft Excel format). Dermopteran WebGestalt results.

- database S3 (Microsoft Excel format). Ancestral primate positively selected genes.
- database S4 (Microsoft Excel format). Ancestral primate WebGestalt results.
- database S5 (Microsoft Excel format). Museum specimen information.
- database S6 (Microsoft Excel format). Primers used to amplify nuclear DNA capture probes.
- database S7 (Microsoft Excel format). Craniodental morphometric measurements for 125 Sunda colugos.

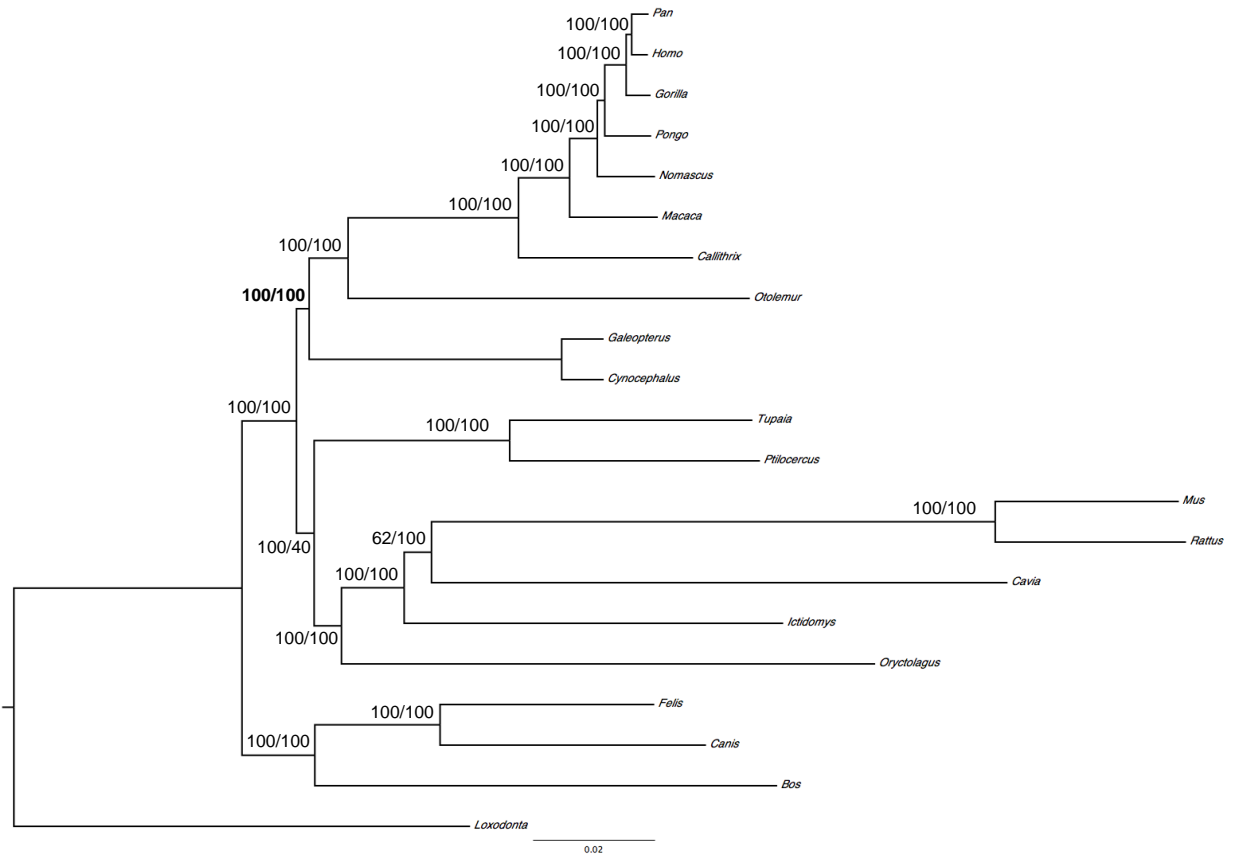

**fig. S1. Maximum likelihood tree based on a concatenated alignment of 634 1:1 orthologous CDS, using all codon positions.** ML bootstrap values (before the slash) are based on 1000 pseudoreplicates. Identical results were obtained when the analysis was restricted to first, second, or first+second codon positions, or amino acid sequences. SVD bootstrap values follow the slash, and are based on 500 pseudoreplicates. The SVD tree favored placement of treeshrews basal to other Euarchontoglires taxa (55%) and only weakly supported Euarchonta (5%).

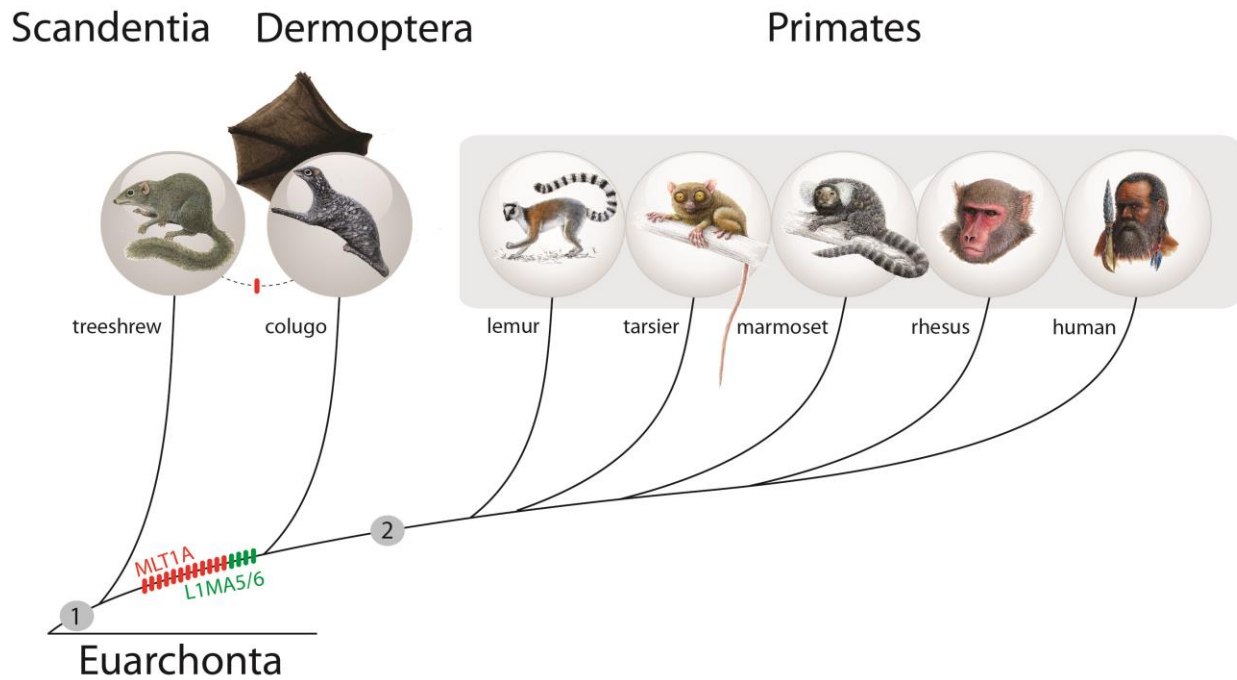

**fig. S2. Phylogenetic tree of Euarchonta.** 1) The monophyly of Euarchonta (Scandentia, Dermoptera, and Primates) is supported by one MLT1A and four MSTD elements (11), and 2) the monophyly of primates is confirmed by synapomorphic retrotransposon insertions (6). The close relationship of primates and colugo is supported by 12 MLT1A (red) and 4 L1MA5/6 (green) elements. One MLT1A insertion supports a sister-group relationship of colugo and tree shrew (at the dotted line between the two). This conflicting pattern is likely the result of incomplete lineage sorting.

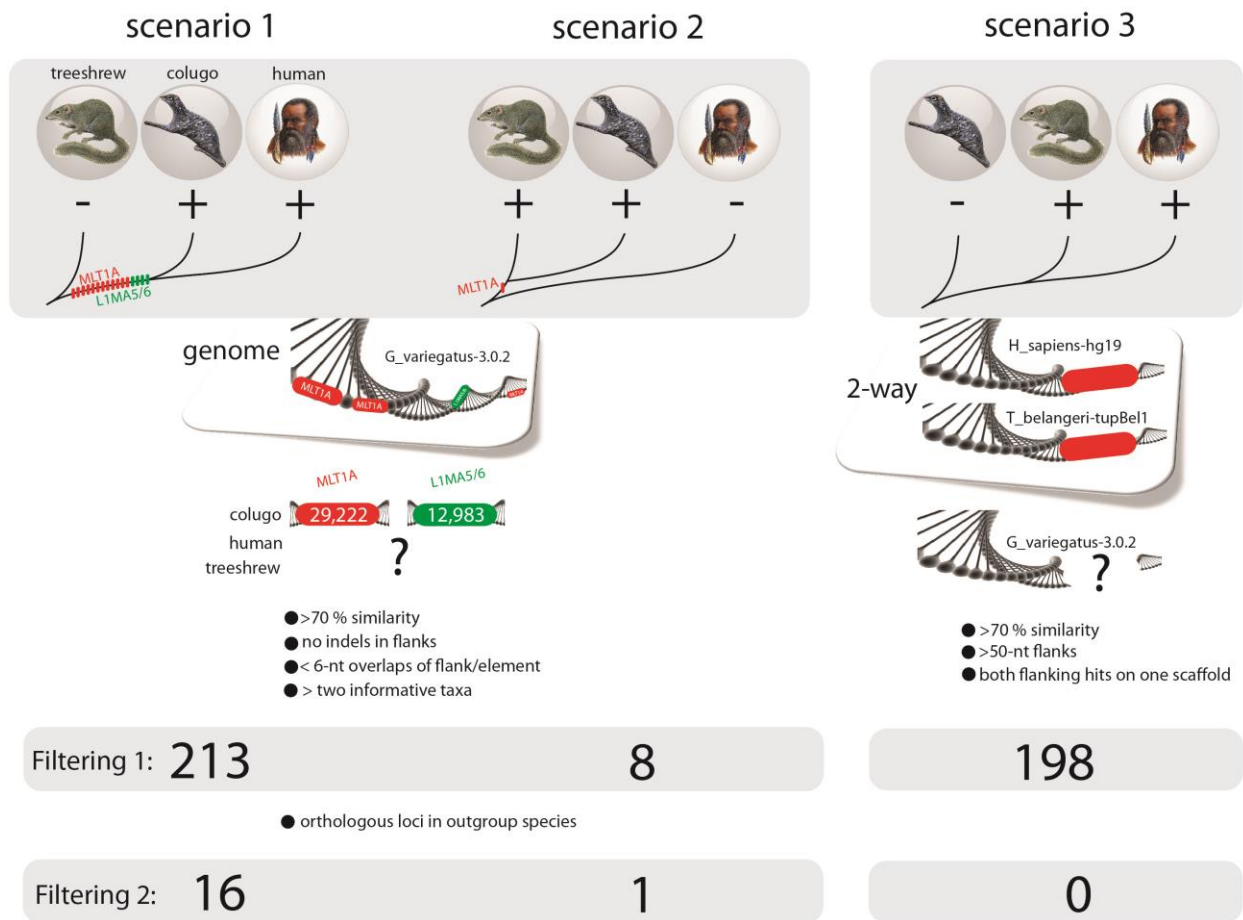

**fig. S3. Description of the retroposon insertion screening strategy.** The three possible phylogenetic scenarios for the relatedness of colugos are presented at the top. Scenario 1 describes a close relationship between the colugo and primates, the second places the treeshrew and colugo on one branch, and scenario 3 proposes a close relationship between the treeshrew and human. MLT1A (red), L1MA5/6 (green).

**fig. S4.** Phylogenetically informative indels supporting (P1-P15) Primatomorpha, (S1-S5) Sundatheria, and (PS1-PS5) Primates + Scandentia. (*Following pages*).

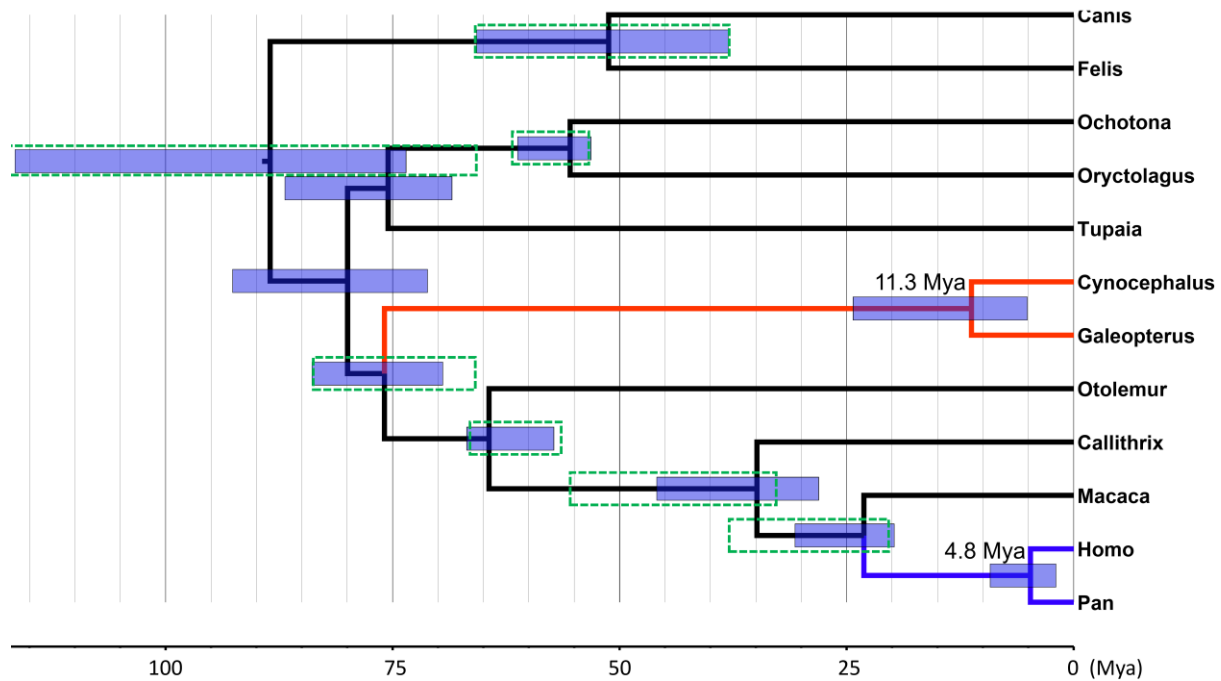

**fig. S5.** Time-tree showing seven external fossil calibration ranges as green boxes (table S9). Topology was based on the maximum likelihood ‘best-tree’. The human/chimpanzee bifurcation (blue) node was left uncalibrated to serve as a control for terminal node age estimates that lack calibrations. Blue boxes are calculated 95% confidence intervals.

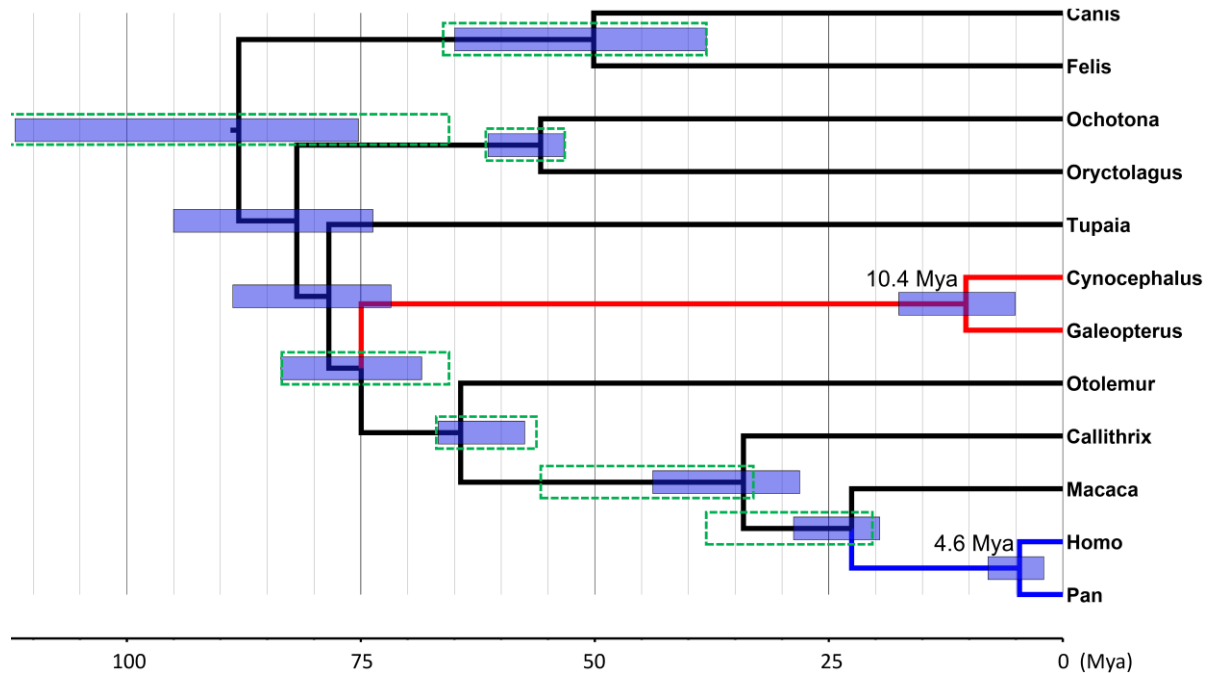

**fig. S6.** Time-tree with showing seven external fossil calibrations as green boxes (table S9). Euarchontan monophyly was enforced on the maximum likelihood ‘best-tree’ topology. The human/chimpanzee node (blue) was left to serve as a control for terminal node age estimates that lack calibrations. Blue boxes are calculated 95% confidence intervals.



a) mtDNA d3 >90% Genome Coverage

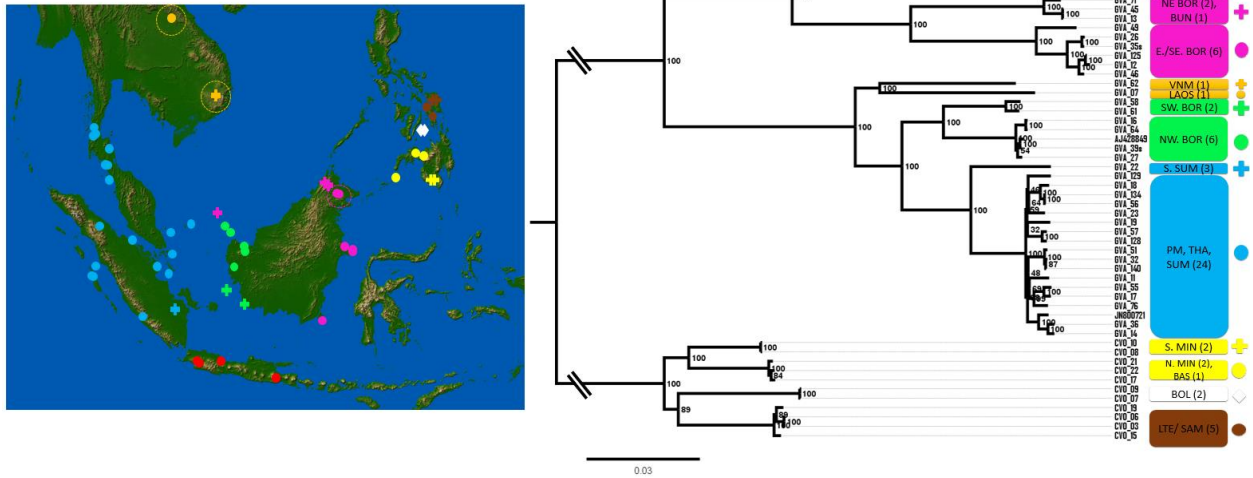

**fig. S7. Maximum likelihood mtDNA tree with 1000 bootstrap iterations, 53 taxa, and greater than 90% mitogenome coverage.** Labels for geographic area are next to sample numbers. Abbreviations: Vietnam=VNM, Thailand=THA, Peninsular Malaysia=PM, Sumatra=SUM, Borneo=BOR, Bunguran=BUN (GVA\_71), Basilan=BAS (CVO\_21), Mindanao=MIN, Bohol=BOL, Leyte=LTE, Samar=SAM, Dinagat=DIN.

a) mtDNA d3 >30% Genome Coverage

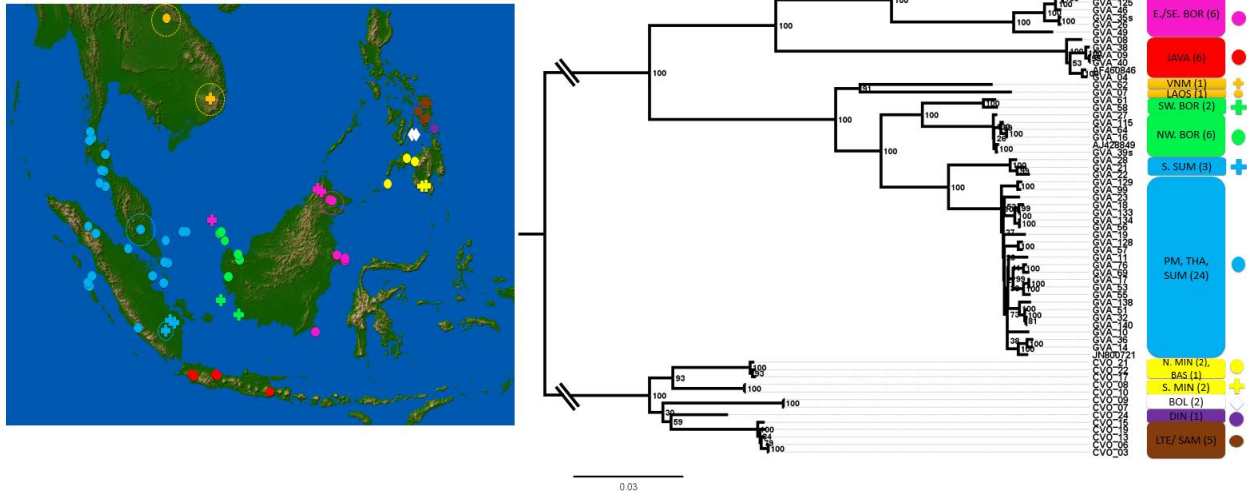

**fig. S8. Maximum likelihood mtDNA tree with 1000 bootstrap iterations 65 taxa, and greater than 30% mitogenome coverage.** Labels for geographic area are next to sample numbers. Abbreviations: Vietnam=VNM, Thailand=THA, Peninsular Malaysia=PM, Sumatra=SUM, Borneo=BOR, Bunguran=BUN (GVA\_71), Basilan=BAS (CVO\_21), Mindanao=MIN, Bohol=BOL, Leyte=LTE, Samar=SAM, Dinagat=DIN.

a) All Nuclear d3 > 40% Target Probe Coverage

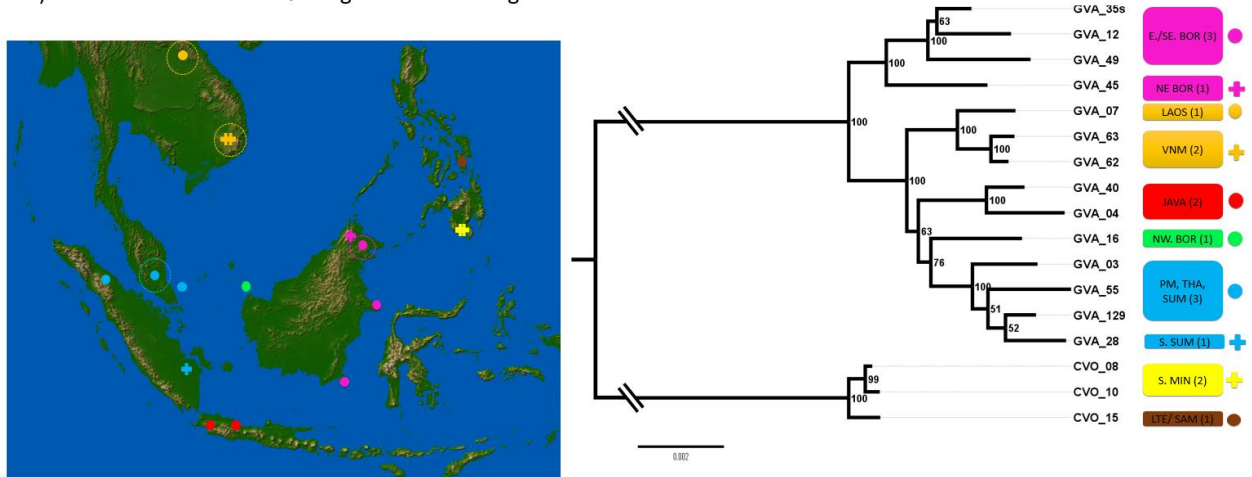

**fig. S9. Maximum likelihood all-nuclear (biparental+Chr Y) tree with 1000 bootstrap iterations with sequence depth  $\geq 3$ .** Labels for geographic area are next to sample numbers. Abbreviations: Vietnam=VNM, Thailand=THA, Peninsular Malaysia=PM, Sumatra=SUM, Borneo=BOR, Mindanao=MIN, Leyte=LTE, Samar=SAM, Dinagat=DIN.

a) Biparental d3 > 40% Target Probe Coverage

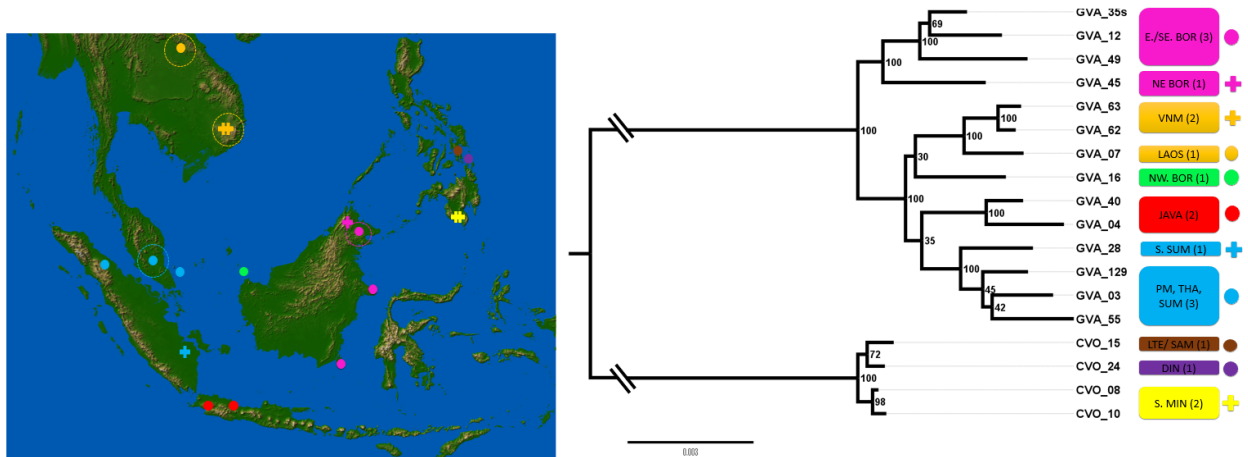

**fig. S10. Maximum likelihood biparental locus tree with 1000 bootstrap iterations with minimum sequence depth  $\geq 2$ .** Abbreviations: Vietnam=VNM, Thailand=THA, Peninsular Malaysia=PM, Sumatra=SUM, Borneo=BOR, Mindanao=MIN, Leyte=LTE, Samar=SAM, Dinagat=DIN.

a) Y-Chromosome d2 >15% Probe Coverage

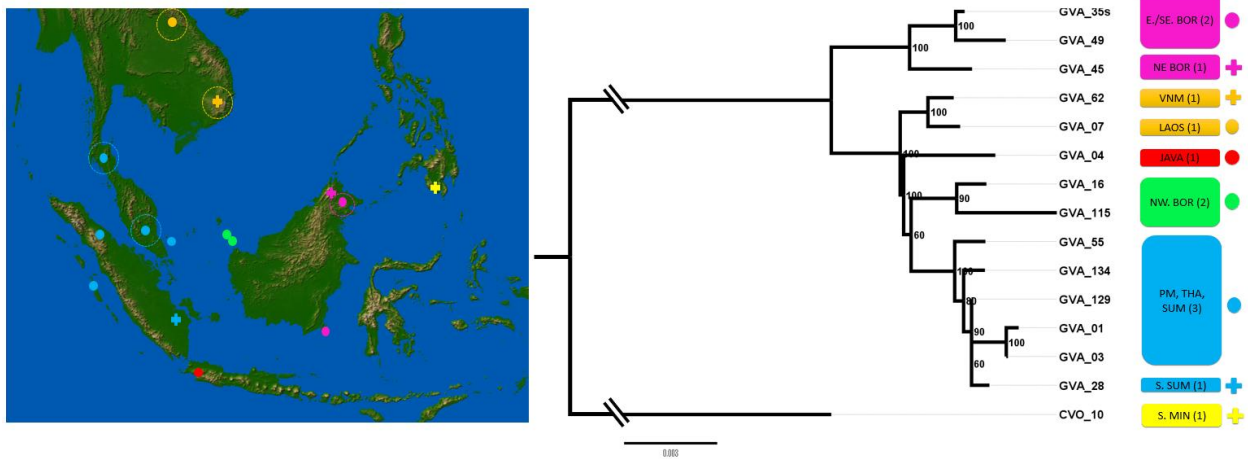

**fig. S11. Maximum likelihood Y chromosome tree (minimum depth  $\geq 2$ ) with 1000 bootstrap iterations.** Abbreviations: Vietnam=VNM, Thailand=THA, Peninsular Malaysia=PM, Sumatra=SUM, Borneo=BOR, Bunguran=BUN, Basilan=BAS, Mindanao=MIN, Bohol=BOL, Leyte=LTE, Samar=SAM, Dinagat=DIN.

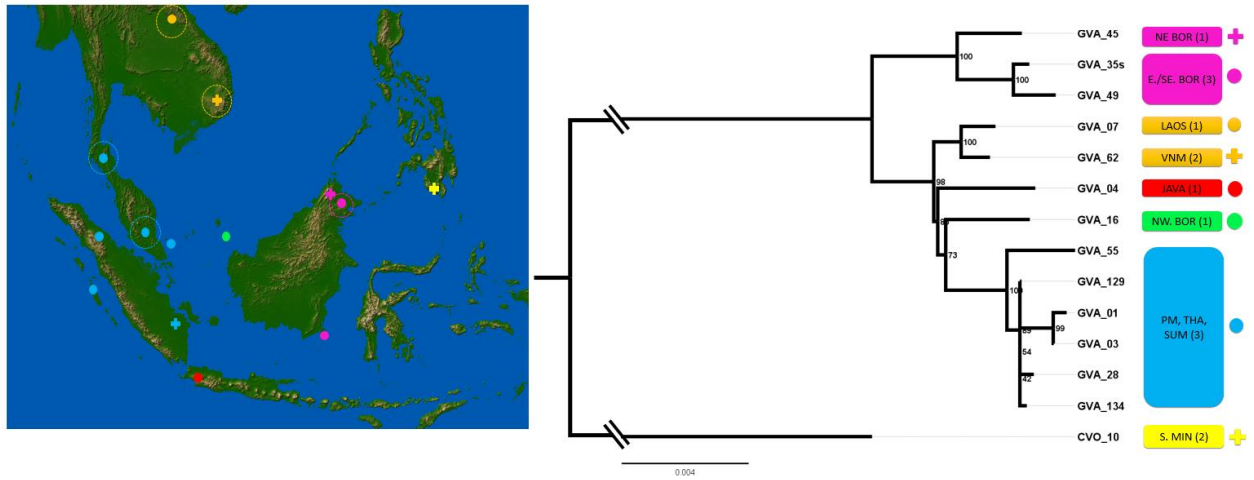

**fig. S12. Maximum likelihood Y chromosome tree (minimum depth  $\geq 3$ ) with 1000 bootstrap iterations.** Abbreviations: Vietnam=VNM, Thailand=THA, Peninsular Malaysia=PM, Sumatra=SUM, Borneo=BOR, Mindanao=MIN.

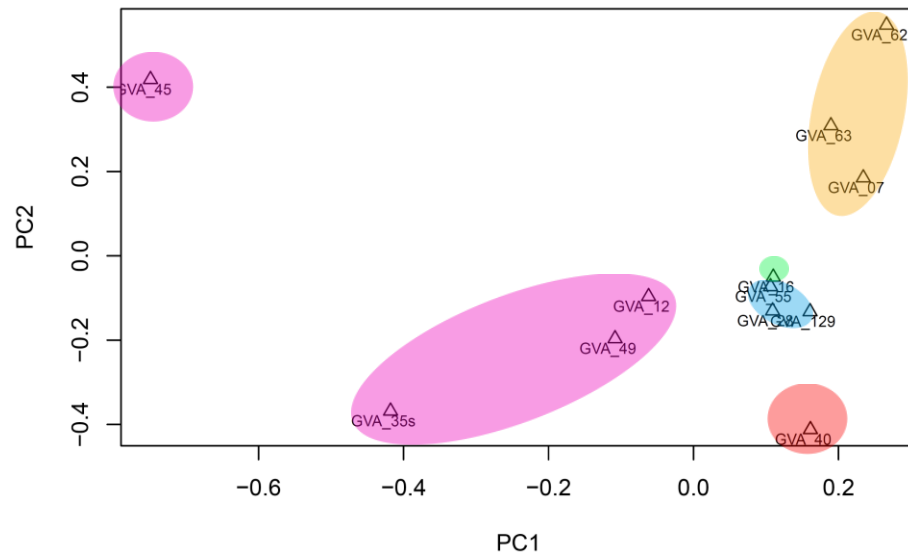

**fig. S13. Principal component analysis (PC1 versus PC2) of X chromosome variation in *Sunda colugos*.** Colors follow geographic clusters in Fig. 3.

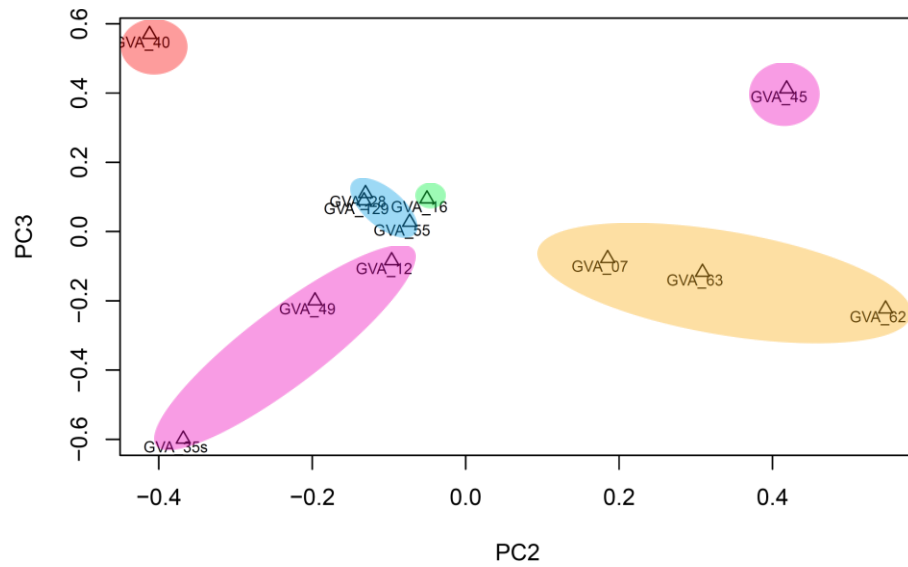

**fig. S14. Principal component analysis (PC2 versus PC3) of X chromosome variation in Sunda colugos.** Colors follow geographic clusters in Fig. 3.



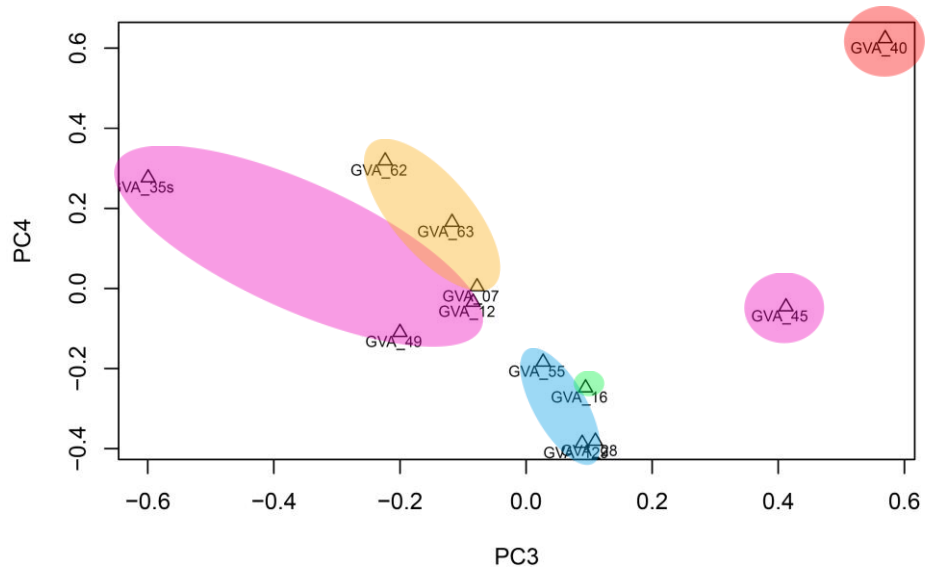

**fig. S15. Principal component analysis (PC3 versus PC4) of X chromosome variation in *Sunda colugos*.** Colors follow geographic clusters in Fig. 3.

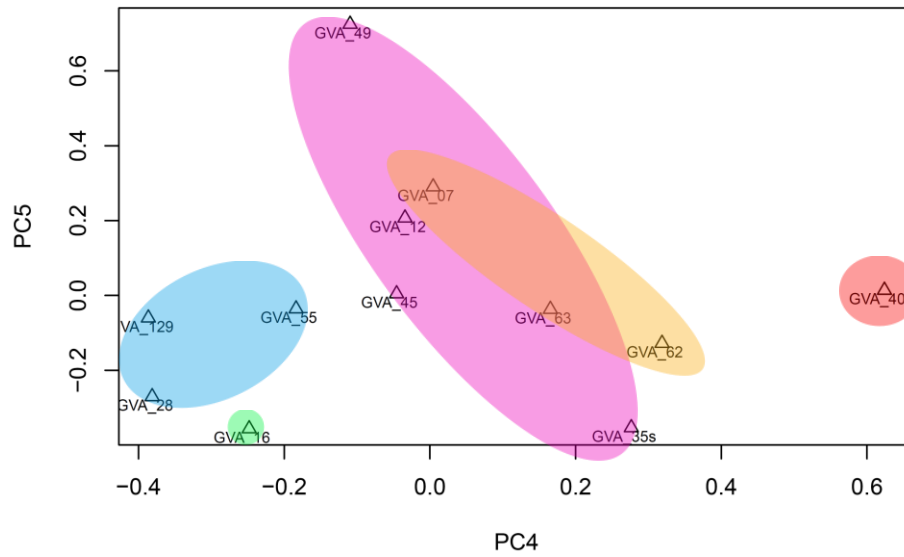

**fig. S16. Principal component analysis (PC4 versus PC5) of X chromosome variation in Sunda colugos.** Colors follow geographic clusters in Fig. 3.

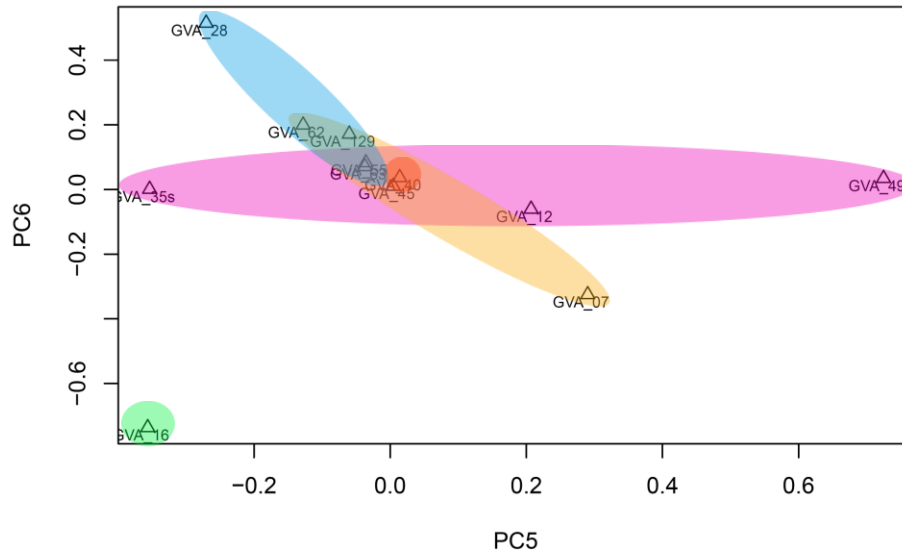

**fig. S17. Principal component analysis (PC5 versus PC6) of X chromosome variation in *Sunda colugos*.** Colors follow geographic clusters in Fig. 3. West Borneo (green) is well separated in this comparison.

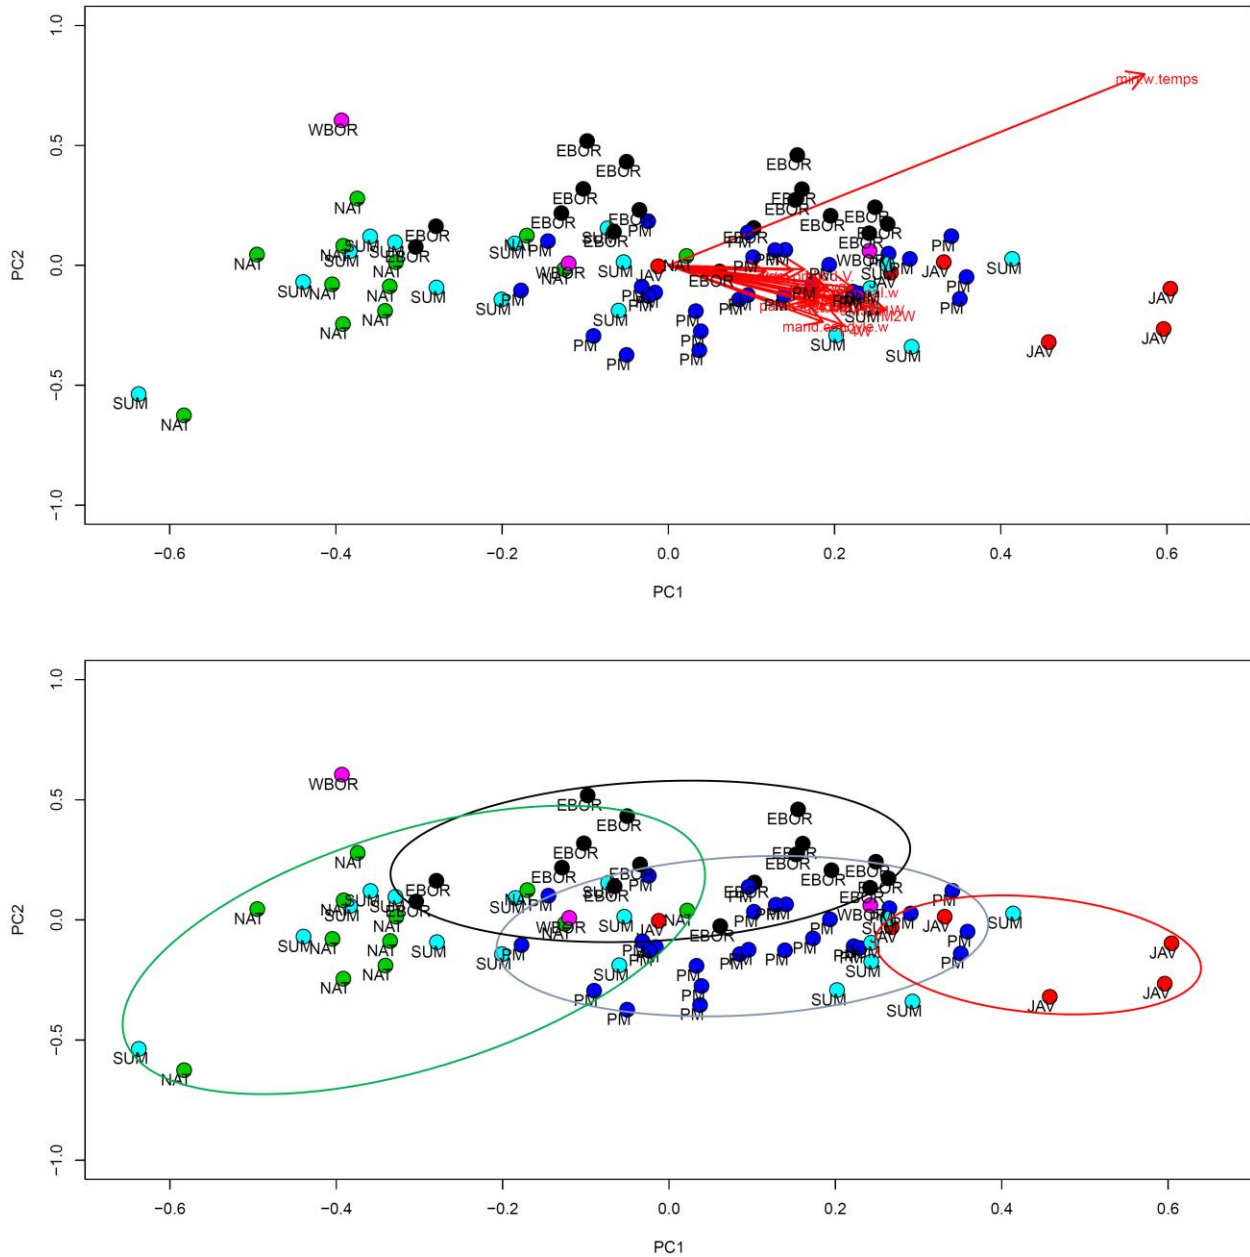

**fig. S18. PCA analysis (singular value decomposition) of 19 craniodental measurements for male and female *Sunda colugos*.** Dwarf individuals were not included. Top: Red arrows are the 19 variable vectors. Bottom: same plot as above except the red arrows have been removed for clarity. Ellipses encircle colugos from different regions. Each point represents one individual. 45% of the variation is explained by PC1 and 29% by PC2.

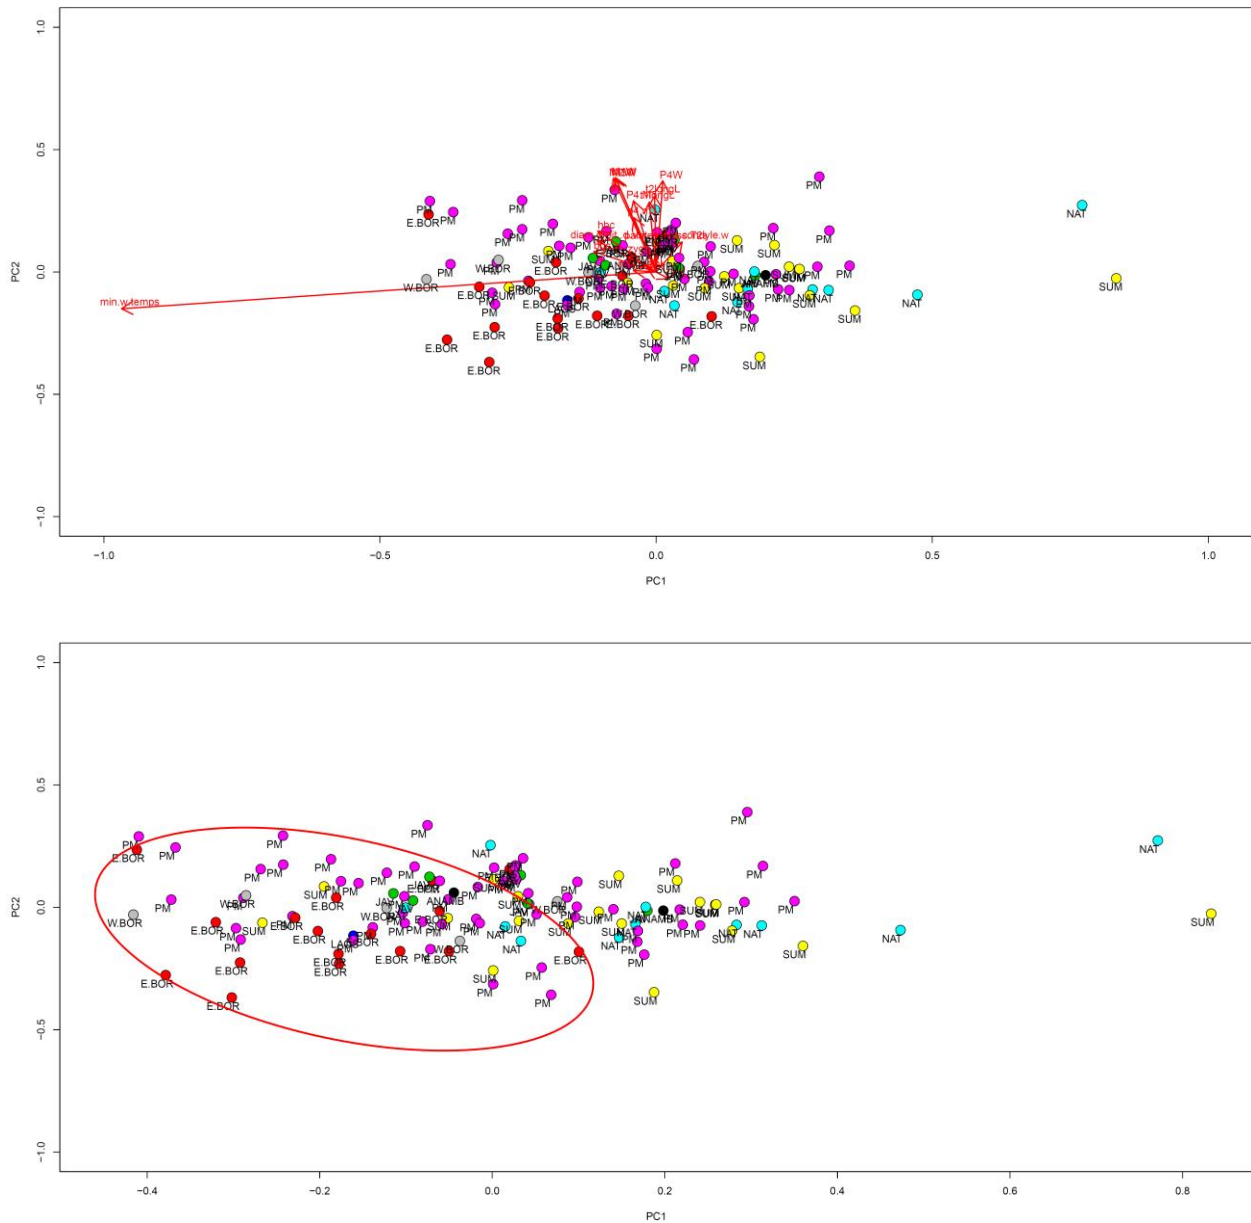

**fig. S19. PCA analysis (singular value decomposition) of 19 craniodental measurements for male and female Sunda colugos, with dwarf individuals included for comparison to fig. S13.** Top: Red arrows are variable vectors. Bottom: same plot as above except the red arrows have been removed and the image enlarged for clarity. Each point is an individual. Red ellipse encircles East Bornean individuals. All of the craniodental measurements are normalized for body size. 44% of the variation is explained by PC1 and 20% by PC2.

**table S1. Eutherian mammals used in phylogenetic comparisons.**

| <b>Common Name</b>              | <b>Species Name</b>               | <b>Sequence Origin</b>       |
|---------------------------------|-----------------------------------|------------------------------|
| <b>Human</b>                    | <i>Homo sapiens</i>               | Ensembl v.79                 |
| <b>Chimpanzee</b>               | <i>Pan troglodytes</i>            | Ensembl v.79                 |
| <b>Gorilla</b>                  | <i>Gorilla gorilla</i>            | Ensembl v.79                 |
| <b>Orangutan</b>                | <i>Pongo abelii</i>               | Ensembl v.79                 |
| <b>Macaque</b>                  | <i>Macaca fascicularis</i>        | Ensembl v.79                 |
| <b>Marmoset</b>                 | <i>Callithrix jacchus</i>         | Ensembl v.79                 |
| <b>Bushbaby</b>                 | <i>Otolemur garnetti</i>          | Ensembl v.79                 |
| <b>Sunda colugo</b>             | <i>Galeopterus variegatus</i>     | G_variegatus-3.0.2           |
| <b>Philippine colugo</b>        | <i>Cynocephalus volans</i>        | 14x ref. assembly-this study |
| <b>Chinese treeshrew</b>        | <i>Tupaia belangeri chinensis</i> | (53)                         |
| <b>Pen-tailed treeshrew</b>     | <i>Ptilocercus lowii</i>          | 5x ref. assembly-this study  |
| <b>Rabbit</b>                   | <i>Oryctolagus cuniculus</i>      | Ensembl v.79                 |
| <b>13-lined ground squirrel</b> | <i>Ictidomys tridecemlineatus</i> | Ensembl v.79                 |
| <b>Guinea Pig</b>               | <i>Cavia porcellus</i>            | Ensembl v.79                 |
| <b>Rat</b>                      | <i>Rattus rattus</i>              | Ensembl v.79                 |
| <b>Mouse</b>                    | <i>Mus musculus</i>               | Ensembl v.79                 |
| <b>Cow</b>                      | <i>Bos taurus</i>                 | Ensembl v.79                 |
| <b>Cat</b>                      | <i>Felis catus</i>                | Ensembl v.79                 |
| <b>Dog</b>                      | <i>Canis familiaris</i>           | Ensembl v.79                 |
| <b>African elephant</b>         | <i>Loxodonta africana</i>         | Ensembl v.79                 |

**table S2. Presence/absence of phylogenetically informative retroposon markers and species distribution.**

|              | 1           | 2           | 3           | 4          | 56                | 61          | 74          | 280         | 288         | 346         | 348        | 398         | 408         | 450         | 576         | 582         | 252         |
|--------------|-------------|-------------|-------------|------------|-------------------|-------------|-------------|-------------|-------------|-------------|------------|-------------|-------------|-------------|-------------|-------------|-------------|
|              | <b>L1MA</b> |             |             |            | <b>MLT1A/MSTD</b> |             |             |             |             |             |            |             |             |             |             |             |             |
|              | <b>A6</b>   | <b>A6</b>   | <b>A6</b>   | <b>A6</b>  | <b>D</b>          | <b>1A0</b>  | <b>D</b>    | <b>D</b>    | <b>1A0</b>  | <b>D</b>    | <b>D</b>   | <b>D</b>    | <b>D</b>    | <b>D</b>    | <b>D</b>    | <b>1A0</b>  | <b>D</b>    |
| Human        | +           | +           | +           | +          | +                 | +           | +           | +           | <b>+dup</b> | +           | +          | +           | +           | +           | +           | +           | -           |
| Chimp        | +           | +           | +           | +          | +                 | +           | +           | +           | +           | +           | +          | +           | +           | +           | +           | +           | -           |
| Baboon       | +           | +           | +           | +          | +                 | +           | +           | +           | +           | +           | +          | +           | +           | <b>n/s</b>  | <b>+1/2</b> | +           | -           |
| Rhesus       | +           | +           | +           | +          | +                 | +           | +           | +           | +           | +           | <b>n/s</b> | +           | +           | <b>n/a</b>  | +           | +           | -           |
| Marmoset     | +           | +           | +           | +          | +                 | +           | +           | +           | +           | <b>+I</b>   | <b>n/a</b> | <b>+I</b>   | +           | <b>n/a</b>  | +           | <b>n/a</b>  | -           |
| Tarsier      | <b>n/s</b>  | +           | +           | <b>+I</b>  | +                 | +           | <b>+1/2</b> | +           | <b>+1/2</b> | <b>+1/2</b> | +          | <b>+1/2</b> | +           | +           | +           | +           | <b>n/a</b>  |
| Bushbaby     | <b>n/s</b>  | +           | +           | <b>n/a</b> | +                 | <b>n/a</b>  | <b>+1/2</b> | +           | <b>n/a</b>  | <b>+1/2</b> | +          | <b>n/a</b>  | +           | +           | +           | +           | -           |
| Mouse lemur  | +           | +           | +           | +          | <b>n/a</b>        | +           | +           | +           | <b>+1/2</b> | +           | +          | +           | <b>+1/2</b> | <b>+1/2</b> | +           | <b>+1/2</b> | -           |
| Colugo       | +           | +           | +           | +          | +                 | +           | +           | +           | +           | +           | +          | +           | +           | +           | +           | +           | +           |
| Treeshrew    | -           | -           | -           | -          | -                 | -           | -           | -           | -           | -           | -          | -           | -           | -           | -           | -           | <b>+dup</b> |
| Pika         | <b>n/a</b>  | <b>d</b>    | -           | -          | -                 | -           | -           | <b>n/a</b>  | -           | -           | <b>n/a</b> | <b>n/a</b>  | <b>n/a</b>  | -           | <b>n/a</b>  | <b>n/a</b>  | <b>n/a</b>  |
| Rabbit       | -           | -           | <b>d</b>    | -          | -                 | -           | -           | <b>n/a</b>  | -           | -           | -          | <b>n/a</b>  | -           | <b>n/a</b>  | -           | <b>n/a</b>  | <b>n/a</b>  |
| Mouse        | <b>n/a</b>  | <b>n/a</b>  | <b>n/a</b>  | <b>n/a</b> | <b>n/a</b>        | <b>n/a</b>  | -           | -           | <b>n/a</b>  | -           | -          | <b>n/a</b>  | <b>n/a</b>  | -           | <b>n/a</b>  | <b>n/a</b>  | <b>n/a</b>  |
| Kangaroo rat | -           | <b>n/s</b>  | <b>n/a</b>  | <b>n/a</b> | <b>n/a</b>        | <b>n/a</b>  | -           | -           | <b>n/a</b>  | -           | <b>n/a</b> | <b>n/a</b>  | <b>n/s</b>  | <b>n/a</b>  | <b>n/a</b>  | <b>n/a</b>  | <b>n/a</b>  |
| Guinea pig   | <b>n/a</b>  | -           | <b>n/a</b>  | <b>n/a</b> | -                 | <b>d</b>    | -           | <b>n/a</b>  | -           | -           | -          | -           | -           | -           | <b>d</b>    | <b>n/a</b>  | -           |
| Squirrel     | <b>n/s</b>  | <b>n/s</b>  | <b>n/a</b>  | <b>n/a</b> | -                 | -           | -           | -           | <b>n/s</b>  | -           | -          | <b>n/s</b>  | <b>n/a</b>  | <b>n/s</b>  | <b>n/s</b>  | <b>n/a</b>  | <b>n/a</b>  |
| Dog          | <b>n/a</b>  | -           | -           | <b>n/a</b> | -                 | -           | -           | -           | -           | -           | -          | <b>n/a</b>  | -           | -           | -           | -           | -           |
| Cat          | -           | <b>n/s</b>  | <b>n/a</b>  | <b>n/a</b> | <b>n/a</b>        | <b>n/s</b>  | -           | -           | -           | <b>n/a</b>  | <b>n/s</b> | <b>n/a</b>  | -           | -           | -           | <b>n/s</b>  | <b>n/a</b>  |
| Megabat      | -           | -           | -           | -          | -                 | -           | -           | -           | <b>n/s</b>  | -           | -          | <b>n/a</b>  | -           | <b>n/a</b>  | -           | <b>n/a</b>  | -           |
| Horse        | <b>n/a</b>  | -           | -           | -          | -                 | -           | -           | -           | -           | -           | -          | <b>n/a</b>  | -           | -           | -           | -           | -           |
| Elephant     | <b>n/a</b>  | <b>n/a</b>  | -           | -          | <b>n/a</b>        | <b>n/a</b>  | -           | -           | -           | -           | -          | <b>n/a</b>  | <b>n/a</b>  | -           | <b>n/a</b>  | <b>n/a</b>  | <b>n/a</b>  |
| Rock hyrax   | -           | <b>n/s</b>  | <b>n/s</b>  | <b>n/s</b> | <b>n/a</b>        | <b>n/a</b>  | <b>n/a</b>  | <b>n/a</b>  | <b>n/s</b>  | -           | -          | <b>n/a</b>  | <b>n/a</b>  | -           | <b>n/a</b>  | <b>n/s</b>  | -           |
| Sloth        | <b>n/s</b>  | -           | <b>n/s</b>  | -          | <b>n/a</b>        | <b>n/s</b>  | <b>n/a</b>  | <b>n/a</b>  | <b>n/s</b>  | -           | <b>n/s</b> | <b>n/a</b>  | <b>n/s</b>  | -           | -           | <b>n/s</b>  | <b>n/a</b>  |
| Armadillo    | <b>n/a</b>  | -           | -           | -          | <b>n/s</b>        | <b>n/s</b>  | -           | <b>n/a</b>  | <b>n/s</b>  | -           | <b>d</b>   | <b>n/a</b>  | <b>n/a</b>  | <b>n/s</b>  | <b>n/a</b>  | <b>n/s</b>  | <b>n/s</b>  |
| DRs          | <b>9 nt</b> | <b>11nt</b> | <b>11nt</b> | -          | <b>7 nt</b>       | <b>5 nt</b> | <b>4 nt</b> | <b>6 nt</b> | <b>5 nt</b> | <b>5 nt</b> | -          | -           | <b>5 nt</b> |

n/s=sequence information not available (gaps, scaffold boundary), n/a=alignment not available, d= deletion in the region of insertion with part of flank (only for absence), +I=additional insertion, +1/2=only one flank is supported (only for presence), dup=duplicated loci.

**table S3. Location of diagnostic retroposon markers in the human genome (GRCh37/hg19).**

| Marker        | Chr       | Strand | From      | To        |               | Position      | Gene             | orthologous |
|---------------|-----------|--------|-----------|-----------|---------------|---------------|------------------|-------------|
| <b>1</b>      | <b>4</b>  | +      | 169239940 | 169240432 | <b>L1MA6</b>  | Intergenic    | Not              | Gv+Hs       |
| <b>2</b>      | <b>2</b>  | -      | 157141497 | 157141918 | <b>L1MA6</b>  | Intergenic    | Not              | Gv+Hs       |
| <b>3</b>      | <b>8</b>  | +      | 121978322 | 121978810 | <b>L1MA6</b>  | Intergenic    | Not              | Gv+Hs       |
| <b>4</b>      | <b>3</b>  | -      | 194397033 | 194396619 | <b>L1MA6</b>  | Intergenic    | Not              | Gv+Hs       |
| <b>56</b>     | <b>1</b>  | +      | 57414697  | 57415317  | <b>MSTD</b>   | <b>Intron</b> | <b>C8B</b>       | Gv+Hs       |
| <b>61</b>     | <b>7</b>  | +      | 81125867  | 81126402  | <b>MLT1A0</b> | Intergenic    | Not              | Gv+Hs       |
| <b>74</b>     | <b>8</b>  | +      | 78898876  | 78899419  | <b>MSTD</b>   | Intergenic    | Not              | Gv+Hs       |
| <b>252c</b>   | <b>5</b>  | +      | 17318796  | 17318992  | <b>MSTD</b>   | Intergenic    | Not              | Gv+Tb       |
| <b>280</b>    | <b>3</b>  | +      | 85314313  | 85314946  | <b>MSTD</b>   | <b>Intron</b> | <b>CADM2</b>     | Gv+Hs       |
| <b>288dup</b> | <b>2</b>  | +      | 112157798 | 112158410 | <b>MLT1A0</b> | <b>Intron</b> | <b>Loc541471</b> | Gv+Hs       |
|               | <b>2</b>  | -      | 87850105  | 87849493  |               | <b>Intron</b> | <b>RMND5A</b>    |             |
| <b>346</b>    | <b>7</b>  | +      | 135186465 | 135187059 | <b>MSTD</b>   | <b>Intron</b> | <b>CNOT4</b>     | Gv+Hs       |
| <b>348</b>    | <b>10</b> | +      | 20888530  | 20889206  | <b>MSTD</b>   | Intergenic    | Not              | Gv+Hs       |
| <b>398</b>    | <b>5</b>  | +      | 32721370  | 32722324  | <b>MSTD</b>   | <b>Intron</b> | <b>NPR3</b>      | Gv+Hs       |
| <b>408</b>    | <b>14</b> | +      | 46562841  | 46563514  | <b>MSTD</b>   | Intergenic    | Not              | Gv+Hs       |
| <b>450</b>    | <b>1</b>  | +      | 176569974 | 176570619 | <b>MSTD</b>   | <b>Intron</b> | <b>PAPPA2</b>    | Gv+Hs       |
| <b>576</b>    | <b>1</b>  | +      | 215140155 | 215140814 | <b>MSTD</b>   | Intergenic    | Not              | Gv+Hs       |
| <b>582</b>    | <b>5</b>  | +      | 27554295  | 27554924  | <b>MLT1A0</b> | Intergenic    | Not              | Gv+Hs       |



**table S4. Chi-square calculation for phylogenetically informative indels (43).**

|                        | <b>Observed</b> | <b>Expected</b> | <b>chi-square</b> |        |
|------------------------|-----------------|-----------------|-------------------|--------|
| <b>Primates</b>        | 19              | 9               | 11.1              |        |
| <b>Sundatheria</b>     | 4               | 9               | 2.8               |        |
| <b>Primates+Tupaia</b> | 4               | 9               | 2.8               |        |
|                        |                 |                 |                   |        |
| <b>Sum(values)</b>     | 27              | 27              | 16.7              |        |
| <b><i>P</i>-value</b>  |                 |                 | 0.000045          | df = 1 |

**table S5. Size of Olfactory receptor (*OR*) and vomeronasal class 1 receptor (*VIR*) gene families found in colugo and 16 select mammalian genomes.**

| Node                     | <i>OR</i> gene families |                      |                 | <i>VIR</i> gene families |                      |                 |
|--------------------------|-------------------------|----------------------|-----------------|--------------------------|----------------------|-----------------|
|                          | intact genes            | partial/pseudo genes | Repertoire size | intact genes             | Partial/pseudo genes | Repertoire size |
| <b>human</b>             | 396                     | 425                  | 821             | 5                        | 115                  | 120             |
| <b>orangutan</b>         | 296                     | 525                  | 821             | 5                        | 114                  | 119             |
| <b>rhesus</b>            | 319                     | 321                  | 640             | 0                        | 51                   | 51              |
| <b>marmoset</b>          | 366                     | 258                  | 624             | 8                        | 42                   | 50              |
| <b>galago</b>            | 356                     | 585                  | 941             | 60                       | 49                   | 109             |
| <b>mouse lemur</b>       | 361                     | 619                  | 980             | 82                       | 109                  | 191             |
| <b>colugo</b>            | 518                     | 1480                 | 1998            | 46                       | 107                  | 153             |
| <b>Chinese treeshrew</b> | 969                     | 1396                 | 2365            | 23                       | 55                   | 78              |
| <b>mouse</b>             | 1127                    | 202                  | 1329            | 187                      | 121                  | 308             |
| <b>rat</b>               | 1194                    | 438                  | 1632            | 106                      | 66                   | 172             |
| <b>rabbit</b>            | 751                     | 278                  | 1029            | 160                      | 132                  | 292             |
| <b>cat</b>               | 679                     | 330                  | 1009            | 21                       | 47                   | 68              |
| <b>dog</b>               | 811                     | 246                  | 1057            | 8                        | 29                   | 37              |
| <b>horse</b>             | 1063                    | 1511                 | 2574            | 36                       | 47                   | 83              |
| <b>pig</b>               | 1254                    | 782                  | 2036            | 8                        | 28                   | 36              |
| <b>cow</b>               | 1055                    | 926                  | 1981            | 40                       | 24                   | 64              |
| <b>opossum</b>           | 1157                    | 300                  | 1457            | 100                      | 26                   | 126             |

**table S6. Nuclear capture efficiency and comparison of individual versus multiplex capture results.** Multiplex and Individual nuclear capture columns report the percentage of reads mapped to reference probe sequences after removal of single end and paired end duplicates and merging of overlapping read pairs. Indiv. / Multiplex column reports the relative fold-increase in efficiency when performing single individual capture compared to multiple individual capture.

| <b>Specimen</b> | <b>Multiplex Nuclear Capture</b> | <b>Individual Nuclear Capture</b> | <b>Indiv. / Multiplex</b> |
|-----------------|----------------------------------|-----------------------------------|---------------------------|
| <b>CVO_06</b>   | 0.14                             | 0.14                              | 1.0                       |
| <b>CVO_07</b>   | 0.01                             | 0.02                              | 2.0                       |
| <b>CVO_08</b>   | 0.20                             | 0.75                              | 3.8                       |
| <b>CVO_15</b>   | 0.14                             | 0.14                              | 1.0                       |
| <b>CVO_22</b>   | 0.05                             | 0.16                              | 3.2                       |
| <b>CVO_24</b>   | 0.02                             | 0.09                              | 4.5                       |
| <b>GVA_12</b>   | 0.04                             | 0.09                              | 2.6                       |
| <b>GVA_17</b>   | 0.02                             | 0.05                              | 2.5                       |
| <b>GVA_22</b>   | 0.07                             | 0.08                              | 1.1                       |
| <b>GVA_26</b>   | 0.15                             | 0.22                              | 1.5                       |
| <b>GVA_27</b>   | 0.09                             | 0.17                              | 1.9                       |
| <b>GVA_32</b>   | 0.08                             | 0.17                              | 2.1                       |
| <b>GVA_40</b>   | 0.13                             | 0.21                              | 1.6                       |
| <b>GVA_49</b>   | 0.08                             | 0.15                              | 1.9                       |
| <b>GVA_61</b>   | 0.04                             | 0.07                              | 1.8                       |
| <b>GVA_64</b>   | 0.01                             | 0.04                              | 4.0                       |
| <b>GVA_75</b>   | 0.03                             | 0.07                              | 2.3                       |
| <b>GVA_76</b>   | 0.03                             | 0.09                              | 3.0                       |
| <b>GVA_129</b>  | 0.10                             | 0.10                              | 1.0                       |
| <b>Average:</b> | 0.08                             | 0.15                              | 2.2                       |

**table S7. Adapter blocking oligos, modified slightly from (48).**

| <b>Adapter Blocked</b>                   | <b>Blocking Oligo Sequence</b>            |
|------------------------------------------|-------------------------------------------|
| <b>#1 Blocks P5:</b>                     | 5' TGTAGATCTCGGTGGTCGCCGTATCATT-P 3'      |
| <b>#2 Blocks Rd1 SP:</b>                 | 5' AGATCGGAAGAGCGTCGTGTAGGGAAAGAGTGT-P 3' |
| <b>#3 Blocks Rd2 SP:</b>                 | 5' GTGACTGGAGTTCAGACGTGTGCTCTTCCGATC-P 3' |
| <b>#4 Blocks P7:</b>                     | 5' CAAGCAGAAGACGGCATACGAGAT-P 3'          |
| <b>#5 Blocks P5<br/>(Complement)</b>     | 5' AATGATACGGCGACCACCGAGATCTACAC-P 3'     |
| <b>#6 Blocks Rd1 SP<br/>(Complement)</b> | 5' ACACTCTTTCCCTACACGACGCTCTTCCGATCT-P 3' |
| <b>#7 Blocks Rd2 SP<br/>(Complement)</b> | 5' GATCGGAAGAGCACACGTCTGAACTCCAGTCAC-P 3' |
| <b>#8 Blocks P7<br/>(Complement)</b>     | 5' ATCTCGTATGCCGTCTTCTGCTTG-P 3'          |

**table S8. mtDNA reference assembly statistics from off-target nuclear capture reads.**

| <b>Individual</b> | <b>Reads Mapped</b> | <b>Total Reads</b> | <b>Average Depth</b> | <b>% of Reference Bases Covered</b> |
|-------------------|---------------------|--------------------|----------------------|-------------------------------------|
| CVO_06            | 1683                | 3315220            | 11.81                | 95.15                               |
| CVO_07            | 5683                | 9655652            | 36.07                | 96.64                               |
| CVO_08            | 3758                | 6397053            | 30.13                | 95.93                               |
| CVO_10            | 4643                | 10610200           | 23.89                | 95.81                               |
| CVO_13            | 146                 | 1740932            | 0.75                 | 43.55                               |
| CVO_15            | 4587                | 8669257            | 24.08                | 96.85                               |
| CVO_21            | 2096                | 4369074            | 8.24                 | 95.44                               |
| CVO_22            | 12524               | 10240636           | 64.23                | 99.40                               |
| CVO_24            | 647                 | 9673217            | 4.67                 | 89.58                               |
| GVA_07            | 5292                | 6220128            | 39.63                | 98.85                               |
| GVA_09            | 1059                | 29808549           | 4.79                 | 66.96                               |
| GVA_12            | 12411               | 14150951           | 81.37                | 99.95                               |
| GVA_16            | 6509                | 12224335           | 23.31                | 99.73                               |
| GVA_17            | 8125                | 6930959            | 54.78                | 99.97                               |
| GVA_18            | 6171                | 14485997           | 30.26                | 99.85                               |
| GVA_22            | 8263                | 3584858            | 21.87                | 99.70                               |
| GVA_27            | 364                 | 1493420            | 1.41                 | 73.37                               |
| GVA_28            | 650                 | 7673989            | 2.12                 | 82.41                               |
| GVA_32            | 2863                | 5050725            | 13.53                | 98.73                               |
| GVA_35s           | 2669                | 11384773           | 11.71                | 99.18                               |
| GVA_39s           | 13891               | 6333908            | 63.6                 | 99.98                               |
| GVA_40            | 7273                | 8461912            | 41.68                | 99.55                               |
| GVA_45            | 16923               | 13081551           | 94.3                 | 100.00                              |
| GVA_49            | 11396               | 5959804            | 91.28                | 100.00                              |
| GVA_52            | 103                 | 6106934            | 0.52                 | 37.50                               |
| GVA_55            | 4984                | 15265857           | 26.69                | 99.75                               |
| GVA_61            | 1392                | 1551730            | 9.12                 | 97.92                               |
| GVA_62            | 4794                | 16809740           | 25.36                | 96.46                               |
| GVA_63            | 273                 | 7911650            | 0.92                 | 48.95                               |
| GVA_64            | 17615               | 11341089           | 79.11                | 99.99                               |
| GVA_69            | 2137                | 17168303           | 6.77                 | 96.57                               |
| GVA_71            | 142                 | 3077004            | 0.35                 | 25.05                               |
| GVA_75            | 337                 | 2478753            | 1.11                 | 60.87                               |
| GVA_76            | 2314                | 9911491            | 7.18                 | 99.05                               |
| GVA_78            | 36                  | 5498695            | 0.12                 | 10.72                               |
| GVA_106           | 64                  | 4035807            | 0.25                 | 18.01                               |
| GVA_115           | 1002                | 5719343            | 3.58                 | 92.03                               |
| GVA_121           | 20                  | 3982512            | 0.06                 | 6.06                                |
| GVA_129           | 20842               | 12079124           | 162.86               | 99.99                               |
| GVA_133           | 570                 | 5284258            | 2.36                 | 76.68                               |
| GVA_134           | 3530                | 13585155           | 22.13                | 99.92                               |
| <b>Mean:</b>      | 4873                | 8617672            | 28.89                | 84.77                               |
| <b>Median:</b>    | 2863                | 7673989            | 21.87                | 96.85                               |

**table S9. External fossil calibrations used to calculate the divergence time between colugo genera.** In some cases original calibrations have been updated to correspond to revisions in the Stratigraphic Code.

| <b>Pair of Taxa</b>                                | <b>Lower Bound (mya)</b> | <b>Upper Bound (mya)</b> | <b>Reference</b>                                                                                                                                   |
|----------------------------------------------------|--------------------------|--------------------------|----------------------------------------------------------------------------------------------------------------------------------------------------|
| <b>Dog-Cat (<i>Canis-Felis</i>)</b>                | 38                       | 66                       | 75                                                                                                                                                 |
| <b>Rabbit-Pika (<i>Oryctolagus-Ochotona</i>)</b>   | 53.7                     | 61.6                     | Minimum based on Ypresian tarsals of crown lagomorph (76) with age of 53.7 Ma (77); maximum following (75)                                         |
| <b>Macaque-Marmoset (<i>Macaca-Callithrix</i>)</b> | 28.1                     | 56                       | 75                                                                                                                                                 |
| <b>Macaque-Human (<i>Macaca-Homo</i>)</b>          | 20.55                    | 38                       | 75                                                                                                                                                 |
| <b>Primates</b>                                    | 56                       | 66                       | 78                                                                                                                                                 |
| <b>Primateomorpha</b>                              | 65.2                     | 83.8                     | Minimum based on <i>Purgatorius</i> (oldest crown fossil, (79)); maximum based on stratigraphic bounding as in Meredith et al. (9) with two stages |
| <b>Euarchontoglires-Laurasiatheria</b>             | 65.2                     | 131.5                    | Minimum based on <i>Purgatorius</i> (79); maximum based on Benton et al., (80)                                                                     |

**table S10. Morphometric principal component loadings for males and females with no dwarfs.**

|                          | <b>PC1</b> | <b>PC2</b> | <b>PC3</b> |
|--------------------------|------------|------------|------------|
| <b>GSL</b>               | 0.18932    | -0.09443   | 0.17312    |
| <b>CBL</b>               | 0.18564    | -0.10606   | 0.19291    |
| <b>ONL</b>               | 0.20692    | -0.14089   | 0.21679    |
| <b>zyg</b>               | 0.18509    | -0.07422   | 0.22832    |
| <b>min.w.temps</b>       | 0.57311    | 0.797471   | -0.06760   |
| <b>P4.M3</b>             | 0.17849    | -0.15021   | -0.11203   |
| <b>bbc</b>               | 0.16389    | -0.01663   | 0.28649    |
| <b>hbc</b>               | 0.11709    | -0.02596   | 0.06355    |
| <b>P4W</b>               | 0.21061    | -0.24898   | -0.13606   |
| <b>M1W</b>               | 0.24827    | -0.16391   | -0.21752   |
| <b>M2W</b>               | 0.26188    | -0.18617   | -0.20261   |
| <b>M3W</b>               | 0.22163    | -0.16353   | -0.10616   |
| <b>max.pal.w</b>         | 0.22208    | -0.09415   | 0.32784    |
| <b>diam.orbit.d.V.</b>   | 0.15018    | -0.01950   | 0.11652    |
| <b>palate.across.T2s</b> | 0.16431    | -0.14817   | 0.09456    |
| <b>p4.m3</b>             | 0.18205    | -0.13435   | -0.01946   |
| <b>mand.condyle.w</b>    | 0.18609    | -0.23571   | 0.30417    |
| <b>t1longL</b>           | 0.16841    | -0.12435   | -0.51270   |
| <b>t2longL</b>           | 0.18179    | -0.15644   | -0.35573   |

**table S11. Morphometric principal component loadings for males and females (dwarfs included) after normalizing by body size.**

|                          | <b>PC1</b> | <b>PC2</b> | <b>PC3</b> |
|--------------------------|------------|------------|------------|
| <b>GSL</b>               | -0.01663   | 0.017175   | -0.00442   |
| <b>ONL</b>               | 0.023339   | -0.02825   | -0.12767   |
| <b>zyg</b>               | -0.05148   | 0.062697   | 0.183351   |
| <b>min.w.temps</b>       | -0.96799   | -0.15036   | -0.07986   |
| <b>P4.M3</b>             | -0.04110   | 0.290691   | 0.060051   |
| <b>bbc</b>               | -0.11283   | 0.083246   | 0.14261    |
| <b>hbc</b>               | -0.10536   | 0.167393   | 0.146996   |
| <b>P4W</b>               | 0.012156   | 0.372447   | 0.076299   |
| <b>M1W</b>               | -0.07394   | 0.385925   | 0.085834   |
| <b>M2W</b>               | -0.07768   | 0.382301   | 0.140197   |
| <b>M3W</b>               | -0.07258   | 0.381536   | 0.134362   |
| <b>max.pal.w</b>         | -0.04104   | 0.006042   | 0.125325   |
| <b>diam.orbit..d.V.</b>  | -0.10677   | 0.127659   | 0.206659   |
| <b>palate.across.T2s</b> | 0.002943   | 0.120638   | -0.04047   |
| <b>p4.m3</b>             | -0.04006   | 0.221703   | 0.073767   |
| <b>mand.condyle.w</b>    | 0.04722    | 0.122476   | 0.325222   |
| <b>t1longL</b>           | -0.01239   | 0.285843   | -0.73167   |
| <b>t2longL</b>           | -0.00268   | 0.311116   | -0.37502   |



**table S12. Maximum mtDNA genetic divergence between seven Sunda colugo groups and five Philippine colugo groups, based on the composite likelihood +  $\Gamma$  genetic distance.** Abbreviations: Vietnam=VNM, Thailand=THA, Peninsular Malaysia=PM, Sumatra=SUM, Borneo=BOR, Bunguran=BUN, Basilan=BAS, Mindanao=MIN, Bohol=BOL, Leyte=LTE, Samar=SAM, Dinagat=DIN.

|                                                    | PM<br>THA<br>SUM | W.BOR | JAVA  | LTE/SAM | BOL      | E.BOR    | NE.BOR | E.MIN | W.MIN  | LAOS  | VNM   |
|----------------------------------------------------|------------------|-------|-------|---------|----------|----------|--------|-------|--------|-------|-------|
| <b>THA/PM/SUM</b>                                  |                  |       |       |         |          |          |        |       |        |       |       |
| <b>W.BOR</b>                                       | 0.058            |       |       |         |          |          |        |       |        |       |       |
| <b>JAVA</b>                                        | 0.153            | 0.149 |       |         |          |          |        |       |        |       |       |
| <b>LTE/SAM</b>                                     | 0.216            | 0.210 | 0.220 |         |          |          |        |       |        |       |       |
| <b>BOL</b>                                         | 0.216            | 0.210 | 0.222 | 0.050   |          |          |        |       |        |       |       |
| <b>E.BOR</b>                                       | 0.150            | 0.146 | 0.121 | 0.216   | 0.216    |          |        |       |        |       |       |
| <b>NE.BOR</b>                                      | 0.144            | 0.141 | 0.121 | 0.211   | 0.212    | 0.070    |        |       |        |       |       |
| <b>E.MIN</b>                                       | 0.212            | 0.211 | 0.216 | 0.048   | 0.052    | 0.215    | 0.209  |       |        |       |       |
| <b>W.MIN</b>                                       | 0.211            | 0.209 | 0.216 | 0.050   | 0.053    | 0.214    | 0.207  | 0.035 |        |       |       |
| <b>LAOS</b>                                        | 0.080            | 0.076 | 0.151 | 0.210   | 0.209    | 0.145    | 0.141  | 0.210 | 0.207  |       |       |
| <b>VNM</b>                                         | 0.070            | 0.069 | 0.144 | 0.196   | 0.197    | 0.136    | 0.133  | 0.197 | 0.196  | 0.064 |       |
| <b>DIN</b>                                         | 0.209            | 0.201 | 0.215 | 0.032   | 0.041    | 0.212    | 0.208  | 0.041 | 0.040  | 0.202 | 0.190 |
|                                                    |                  |       |       |         | mean     | stdev    | min    | max   | median |       |       |
| <b>Average Sundaic Between Group Divergence</b>    |                  |       |       |         | 0.117238 | 0.035714 | 0.058  | 0.153 | 0.136  |       |       |
| <b>Average Philippine Between Group Divergence</b> |                  |       |       |         | 0.0442   | 0.007391 | 0.032  | 0.053 | 0.0445 |       |       |

**table S13. X chromosome sequence divergence between eight Sunda colugo groups and three Philippine colugo groups, based on maximum composite likelihood +  $\Gamma$  genetic distance.** Includes all individuals with >40% probe base coverage. Abbreviations: Vietnam=VNM, Thailand=THA, Peninsular Malaysia=PM, Sumatra=SUM, Borneo=BOR, Bunguran=BUN, Basilan=BAS, Mindanao=MIN, Bohol=BOL, Leyte=LTE, Samar=SAM, Dinagat=DIN.

|                                                    | <b>E.BOR</b> | <b>THA/P<br/>M/SUM</b> | <b>VNM</b> | <b>NW.<br/>BOR</b> | <b>S.<br/>SUM</b> | <b>LTE/<br/>SAM</b> | <b>NE.<br/>BOR</b> | <b>E.<br/>MIN</b> | <b>JAVA</b> | <b>DIN</b> | <b>SE.<br/>BOR</b> |
|----------------------------------------------------|--------------|------------------------|------------|--------------------|-------------------|---------------------|--------------------|-------------------|-------------|------------|--------------------|
| <b>E.BOR</b>                                       |              |                        |            |                    |                   |                     |                    |                   |             |            |                    |
| <b>THA/PM/<br/>SUM</b>                             | 0.0070       |                        |            |                    |                   |                     |                    |                   |             |            |                    |
| <b>VNM</b>                                         | 0.0057       | 0.0056                 |            |                    |                   |                     |                    |                   |             |            |                    |
| <b>NW.BOR</b>                                      | 0.0051       | 0.0052                 | 0.0039     |                    |                   |                     |                    |                   |             |            |                    |
| <b>S.SUM</b>                                       | 0.0051       | 0.0039                 | 0.0043     | 0.0034             |                   |                     |                    |                   |             |            |                    |
| <b>LTE/SAM</b>                                     | 0.0276       | 0.0291                 | 0.0288     | 0.0289             | 0.0274            |                     |                    |                   |             |            |                    |
| <b>NE.BOR</b>                                      | 0.0041       | 0.0073                 | 0.0059     | 0.0059             | 0.0057            | 0.0285              |                    |                   |             |            |                    |
| <b>E.MIN</b>                                       | 0.0267       | 0.0285                 | 0.0282     | 0.0280             | 0.0270            | 0.0014              | 0.0276             |                   |             |            |                    |
| <b>JAVA</b>                                        | 0.0062       | 0.0062                 | 0.0052     | 0.0051             | 0.0047            | 0.0299              | 0.0069             | 0.0291            |             |            |                    |
| <b>DIN</b>                                         | 0.0285       | 0.0301                 | 0.0299     | 0.0302             | 0.0281            | 0.0010              | 0.0294             | 0.0012            | 0.0312      |            |                    |
| <b>SE.BOR</b>                                      | 0.0038       | 0.0096                 | 0.0080     | 0.0073             | 0.0071            | 0.0311              | 0.0053             | 0.0296            | 0.0089      | 0.0315     |                    |
| <b>LAOS</b>                                        | 0.0060       | 0.0058                 | 0.0027     | 0.0047             | 0.0047            | 0.0294              | 0.0066             | 0.0286            | 0.0056      | 0.0302     | 0.0086             |
|                                                    |              |                        |            |                    | Mean              | Stdev               | Min                | Max               | Media<br>n  |            |                    |
| <b>Average Sundaic Between Group Divergence</b>    |              |                        |            |                    | 0.0058            | 0.0016              | 0.0027             | 0.0096            | 0.0057      |            |                    |
| <b>Average Philippine Between Group Divergence</b> |              |                        |            |                    | 0.0012            | 0.0002              | 0.0010             | 0.0014            | 0.0012      |            |                    |

**table S14. Pairwise sequence divergence between colugos from Peninsular Malaysia (PM), Sumatra (SUM) and Thailand (THA), and their satellite islands (blue).**

|                                                 | THA    | P.Bakong | P.Tanahbala | P.Aur  | P.Siantan   | PM           | P.Langkawi | P.Bintang  | KoAdang       | P.Pini | SUM    | P. Penuba |
|-------------------------------------------------|--------|----------|-------------|--------|-------------|--------------|------------|------------|---------------|--------|--------|-----------|
| THA                                             |        |          |             |        |             |              |            |            |               |        |        |           |
| P.Bakong                                        | 0.0109 |          |             |        |             |              |            |            |               |        |        |           |
| P.Tanahbala                                     | 0.0110 | 0.0102   |             |        |             |              |            |            |               |        |        |           |
| P.Aur                                           | 0.0106 | 0.0109   | 0.0104      |        |             |              |            |            |               |        |        |           |
| P.Siantan                                       | 0.0097 | 0.0101   | 0.0096      | 0.0078 |             |              |            |            |               |        |        |           |
| PM                                              | 0.0113 | 0.0109   | 0.0112      | 0.0107 | 0.0103      |              |            |            |               |        |        |           |
| P.Langkawi                                      | 0.0104 | 0.0106   | 0.0112      | 0.0101 | 0.0094      | 0.0102       |            |            |               |        |        |           |
| P.Bintang                                       | 0.0099 | 0.0102   | 0.0102      | 0.0032 | 0.0070      | 0.0097       | 0.0094     |            |               |        |        |           |
| KoAdang                                         | 0.0084 | 0.0103   | 0.0097      | 0.0114 | 0.0114      | 0.0099       | 0.0112     | 0.0108     |               |        |        |           |
| P.Pini                                          | 0.0104 | 0.0097   | 0.0030      | 0.0103 | 0.0094      | 0.0100       | 0.0104     | 0.0098     | 0.0105        |        |        |           |
| SUM                                             | 0.0111 | 0.0102   | 0.0101      | 0.0114 | 0.0106      | 0.0111       | 0.0112     | 0.0106     | 0.0109        | 0.0095 |        |           |
| P.Penuba                                        | 0.0110 | 0.0025   | 0.0103      | 0.0112 | 0.0103      | 0.0117       | 0.0107     | 0.0104     | 0.0105        | 0.0094 | 0.0103 |           |
| P.Rupat                                         | 0.0111 | 0.0097   | 0.0111      | 0.0111 | 0.0108      | 0.0121       | 0.0107     | 0.0115     | 0.0118        | 0.0095 | 0.0105 | 0.0100    |
|                                                 |        |          |             |        | <b>Mean</b> | <b>Stdev</b> | <b>Min</b> | <b>Max</b> | <b>Median</b> |        |        |           |
| <b>THA/PM/SUM to island sequence divergence</b> |        |          |             |        | 0.0105      | 0.0007       | 0.0084     | 0.0121     | 0.0106        |        |        |           |

**table S15. Within-group mtDNA maximum composite likelihood +  $\Gamma$  genetic distance matrix for nine Sunda colugo groups and five Philippine colugo groups.** Abbreviations: Vietnam=VNM, Thailand=THA, Peninsular Malaysia=PM, Sumatra=SUM, Borneo=BOR, Bunguran=BUN, Basilan=BAS, Mindanao=MIN, Bohol=BOL, Leyte=LTE, Samar=SAM, Dinagat=DIN, nc=not calculated (single individuals).

|                                      |       |
|--------------------------------------|-------|
| <b>Thailand/Pen.Malaysia/Sumatra</b> | 0.010 |
| <b>SW Borneo</b>                     | 0.007 |
| <b>Java</b>                          | 0.007 |
| <b>NW Borneo</b>                     | 0.003 |
| <b>SAM/LTE</b>                       | 0.003 |
| <b>Bohol</b>                         | 0.000 |
| <b>E. Borneo</b>                     | 0.011 |
| <b>N.E. Borneo</b>                   | 0.006 |
| <b>E.MIN</b>                         | 0.000 |
| <b>W. MIN</b>                        | 0.002 |
| <b>S.SUM</b>                         | 0.006 |
| <b>LAOS</b>                          | nc    |
| <b>VNM</b>                           | nc    |
| <b>DIN</b>                           | nc    |

**table S16. mtDNA genetic distance between nine Sundaic colugo groups and five Philippine colugo groups, based on the maximum composite likelihood +  $\Gamma$  distance matrix.** Abbreviations: Vietnam=VNM, Thailand=THA, Peninsular Malaysia=PM, Sumatra=SUM, Borneo=BOR, Bunguran=BUN, Basilan=BAS, Mindanao=MIN, Bohol=BOL, Leyte=LTE, Samar=SAM, Dinagat=DIN.

|                                                    | <b>PM<br/>THA<br/>SUM</b> | <b>SW.BOR</b> | <b>JAVA</b> | <b>NW.BOR</b> | <b>LTE/SAM</b> | <b>BOL</b> | <b>E.BOR</b> | <b>NE.BOR</b> | <b>E. MIN</b> | <b>W.MIN</b> | <b>S.SUM</b> | <b>LAOS</b> | <b>VNM</b> |
|----------------------------------------------------|---------------------------|---------------|-------------|---------------|----------------|------------|--------------|---------------|---------------|--------------|--------------|-------------|------------|
| <b>PM/THA/SUM</b>                                  |                           |               |             |               |                |            |              |               |               |              |              |             |            |
| <b>SW.BOR</b>                                      | 0.059                     |               |             |               |                |            |              |               |               |              |              |             |            |
| <b>JAVA</b>                                        | 0.154                     | 0.149         |             |               |                |            |              |               |               |              |              |             |            |
| <b>NW.BOR</b>                                      | 0.058                     | 0.037         | 0.149       |               |                |            |              |               |               |              |              |             |            |
| <b>LTE/SAM</b>                                     | 0.217                     | 0.208         | 0.22        | 0.210         |                |            |              |               |               |              |              |             |            |
| <b>BOL</b>                                         | 0.217                     | 0.209         | 0.222       | 0.210         | 0.050          |            |              |               |               |              |              |             |            |
| <b>E.BOR</b>                                       | 0.151                     | 0.145         | 0.121       | 0.146         | 0.216          | 0.216      |              |               |               |              |              |             |            |
| <b>NE.BOR</b>                                      | 0.146                     | 0.140         | 0.121       | 0.141         | 0.211          | 0.212      | 0.07         |               |               |              |              |             |            |
| <b>E.MIN</b>                                       | 0.213                     | 0.208         | 0.216       | 0.212         | 0.048          | 0.052      | 0.215        | 0.209         |               |              |              |             |            |
| <b>W.MIN</b>                                       | 0.213                     | 0.206         | 0.216       | 0.210         | 0.050          | 0.053      | 0.214        | 0.207         | 0.035         |              |              |             |            |
| <b>S.SUM</b>                                       | 0.034                     | 0.057         | 0.146       | 0.057         | 0.204          | 0.205      | 0.138        | 0.136         | 0.200         | 0.199        |              |             |            |
| <b>LAOS</b>                                        | 0.081                     | 0.075         | 0.151       | 0.076         | 0.210          | 0.209      | 0.145        | 0.141         | 0.210         | 0.207        | 0.074        |             |            |
| <b>VNM</b>                                         | 0.070                     | 0.067         | 0.144       | 0.070         | 0.196          | 0.197      | 0.136        | 0.133         | 0.197         | 0.196        | 0.070        | 0.064       |            |
| <b>DIN</b>                                         | 0.210                     | 0.202         | 0.215       | 0.201         | 0.032          | 0.041      | 0.212        | 0.208         | 0.041         | 0.040        | 0.193        | 0.202       | 0.190      |
|                                                    |                           |               |             |               | mean           | stdev      | min          | max           | median        |              |              |             |            |
| <b>Average Sundaic Between Group Divergence</b>    |                           |               |             |               | 0.107          | 0.040      | 0.034        | 0.154         | 0.127         |              |              |             |            |
| <b>Average Philippine Between Group Divergence</b> |                           |               |             |               | 0.044          | 0.007      | 0.032        | 0.053         | 0.045         |              |              |             |            |

**table S17. BPP species estimation (70) results for the *Galeopterus* biparental dataset (53 partitions, with 9,628 sites after removal of sites with missing data, clean data=1).**

| Model                        | Nodes <sup>a</sup> | Posterior Probability          | Posterior Probability | Posterior Probability | Posterior Probability | Posterior Probability |
|------------------------------|--------------------|--------------------------------|-----------------------|-----------------------|-----------------------|-----------------------|
| 1                            | 000000             | 0.00000                        | 0.00000               | 0.00000               | 0.00000               | 0.00000               |
| 2                            | 100000             | 0.00000                        | 0.00000               | 0.00000               | 0.00000               | 0.00000               |
| 3                            | 101000             | 0.00000                        | 0.00000               | 0.00000               | 0.00000               | 0.00000               |
| 4                            | 101010             | 0.00000                        | 0.00000               | 0.00000               | 0.00000               | 0.00000               |
| 5                            | 101011             | 0.00028                        | 0.00000               | 0.00000               | 0.00000               | 0.00000               |
| 6                            | 101100             | 0.00000                        | 0.00000               | 0.00000               | 0.00000               | 0.00000               |
| 7                            | 101110             | 0.00000                        | 0.00004               | 0.00000               | 0.00000               | 0.00211               |
| 8                            | 101111             | 0.00007                        | 0.00001               | 0.00006               | 0.00000               | 0.00145               |
| 9                            | 110000             | 0.00000                        | 0.00000               | 0.00000               | 0.00575               | 0.04417               |
| 10                           | 111000             | 0.00000                        | 0.00000               | 0.00000               | 0.00989               | 0.00496               |
| 11                           | 111010             | 0.00595                        | 0.00199               | 0.00099               | 0.15714               | 0.06777               |
| 12                           | 111011             | 0.42029                        | 0.17070               | 0.16314               | 0.82608               | 0.64262               |
| 13                           | 111100             | 0.00000                        | 0.00000               | 0.00000               | 0.00000               | 0.00092               |
| 14                           | 111110             | 0.01321                        | 0.00720               | 0.00590               | 0.00006               | 0.02099               |
| 15                           | 111111             | 0.56021                        | 0.82007               | 0.82993               | 0.00109               | 0.21502               |
| <b>Parameters</b>            |                    | Parameters estimated from data | Sensitivity analysis  | Sensitivity analysis  | Sensitivity analysis  | Sensitivity analysis  |
| theta ( $\alpha$ , $\beta$ ) |                    | 2, 408                         | 2, 1000               | 2, 1000               | 2, 10                 | 2, 10                 |
| tau ( $\alpha$ , $\beta$ )   |                    | 2, 344                         | 2, 10                 | 2, 1000               | 2, 10                 | 2, 1000               |

<sup>a</sup>The ancestral nodes (left to right) for *Galeopterus*: **1**) East Borneo (EB) to Northeast Borneo (NEB), **2**) EB+NEB, **3**) Node 4 to Node 5, **4**) Laos (L) +Vietnam (V), **5**) Java (J) to node 6, **6**) West Borneo (W) to Pen.Malay./Sumatra (PS).

**Guide tree with PP for each node (i.e., support for distinct species) in the five analyses shown above (left to right):**

((EB, NEB) #0.999650,((V, L) #0.573490, (J, (W, PS) #0.980845) #1.000000) #1.000000) #1.000000;  
 ((EB, NEB) #0.999955,((V, L) #0.827310, (J, (W, PS) #0.990770) #1.000000) #1.000000) #1.000000;  
 ((EB, NEB) #0.999945,((V, L) #0.835875, (J, (W, PS) #0.993115) #1.000000) #1.000000) #1.000000;  
 ((EB, NEB) #1.000000,((V, L) #0.001145, (J, (W, PS) #0.827160) #0.984355) #0.994245) #1.000000;  
 ((EB, NEB) #0.996440,((V, L) #0.240490, (J, (W, PS) #0.859100) #0.949955) #0.955830) #1.000000;

**table S18. BPP species estimation (70) results for the *Cynocephalus* biparental dataset (101 partitions, with 44,072 sites after removal of sites with missing data, clean data=1).**

| Model                     | Nodes <sup>a</sup> | Posterior Probability          | Posterior Probability | Posterior Probability | Posterior Probability |
|---------------------------|--------------------|--------------------------------|-----------------------|-----------------------|-----------------------|
| <b>1</b>                  | 00                 | 0.0000                         | 0.0000                | 0.0000                | 0.0000                |
| <b>2</b>                  | 10                 | 0.3913                         | 0.2381                | 0.3365                | 0.3799                |
| <b>3</b>                  | 11                 | 0.6087                         | 0.7619                | 0.6635                | 0.6202                |
| <b>Parameters</b>         |                    | Parameters estimated from data | Sensitivity analysis  | Sensitivity analysis  | Sensitivity analysis  |
| theta ( $\alpha, \beta$ ) |                    | 2, 2040                        | 2, 1000               | 2, 2040               | 2, 2040               |
| tau ( $\alpha, \beta$ )   |                    | 2, 771                         | 2, 771                | 2, 10                 | 2, 1000               |

<sup>a</sup>The ancestral nodes (left to right) for *Cynocephalus*: **1)** Mindanao to Leyte+Dinagat, **2)** Leyte+Dinagat.

**Guide tree with PP for each node (i.e., support for distinct species) in the four analyses shown above (left to right):**

(Mindanao, (Leyte, Dinagat) #0.608665) #1.000000;

(Mindanao, (Leyte, Dinagat) #0.761880) #1.000000;

(Mindanao, (Leyte, Dinagat) #0.663515) #1.000000;

(Mindanao, (Leyte, Dinagat) #0.620150) #1.000000;

**table S19. X chromosome genetic variation principal component loadings.**

|                | <b>V1</b> | <b>V2</b> | <b>V3</b> | <b>V4</b> | <b>V5</b> | <b>V6</b> | <b>V7</b> | <b>V8</b> | <b>V9</b> | <b>V10</b> | <b>V11</b> | <b>V12</b> |
|----------------|-----------|-----------|-----------|-----------|-----------|-----------|-----------|-----------|-----------|------------|------------|------------|
| <b>GVA_62</b>  | 0.266233  | 0.547404  | -0.22344  | 0.318666  | -0.12787  | 0.199536  | -0.22883  | -0.17031  | 0.491531  | -0.11319   | -0.05209   | 0.288675   |
| <b>GVA_55</b>  | 0.106196  | -0.07303  | 0.027003  | -0.1837   | -0.03574  | 0.083016  | 0.033093  | -0.13947  | -0.01564  | -0.09455   | 0.90977    | 0.288675   |
| <b>GVA_35s</b> | -0.417930 | -0.36815  | -0.59937  | 0.276448  | -0.35334  | 0.000792  | 0.174165  | -0.02659  | 0.021265  | 0.119834   | -0.0103    | 0.288675   |
| <b>GVA_40</b>  | 0.161232  | -0.41209  | 0.569543  | 0.623993  | 0.013976  | 0.037057  | -0.00685  | -0.01491  | 0.043918  | 0.046969   | -0.03364   | 0.288675   |
| <b>GVA_49</b>  | -0.108230 | -0.19643  | -0.20001  | -0.10953  | 0.7248    | 0.034303  | -0.42293  | -0.00116  | 0.130662  | 0.300926   | -0.03684   | 0.288675   |
| <b>GVA_45</b>  | -0.749030 | 0.418413  | 0.412216  | -0.0457   | 0.004591  | 0.010241  | 0.0647    | -0.02743  | 0.01838   | 0.055598   | 0.006742   | 0.288675   |
| <b>GVA_07</b>  | 0.234199  | 0.185082  | -0.07773  | 0.00447   | 0.290208  | -0.3249   | 0.710371  | 0.291528  | 0.131815  | 0.155633   | -0.02253   | 0.288675   |
| <b>GVA_63</b>  | 0.189492  | 0.308727  | -0.11744  | 0.165388  | -0.03705  | 0.070891  | -0.14557  | 0.061808  | -0.81878  | 0.202542   | -0.03823   | 0.288675   |
| <b>GVA_16</b>  | 0.109996  | -0.05044  | 0.094384  | -0.24809  | -0.35616  | -0.73628  | -0.37578  | 0.054117  | 0.088315  | 0.068156   | -0.07762   | 0.288675   |
| <b>GVA_12</b>  | -0.06196  | -0.09647  | -0.08403  | -0.03419  | 0.206989  | -0.0607   | -0.01122  | 0.091066  | -0.16144  | -0.88744   | -0.16348   | 0.288675   |
| <b>GVA_129</b> | 0.160713  | -0.13246  | 0.088955  | -0.38649  | -0.06008  | 0.171362  | 0.252997  | -0.70848  | -0.04948  | 0.071862   | -0.33086   | 0.288675   |
| <b>GVA_28</b>  | 0.109087  | -0.13056  | 0.109916  | -0.38127  | -0.27032  | 0.514682  | -0.04415  | 0.589822  | 0.119453  | 0.07366    | -0.15091   | 0.288675   |
